# Supplementary material for: New Non-Toxic N-alkyl Cholinium-Based Ionic Liquids as Excipients to Improve the Solubility of Poorly Water-Soluble Drugs
Source: MDPI journal article supplement (doi:10.3390/sym13112053), 2021-10-31
Supplement: s1 [file s1]

## **New non-toxic *N*-alkyl cholinium-based ionic liquids as excipients to improve the solubility of poorly water-soluble drugs**

Ana R. Jesus,<sup>a</sup> Luís R. Raposo,<sup>b</sup> Mário R. C. Soromenho,<sup>a</sup> José M. S. S. Esperança,<sup>a</sup> Pedro V. Baptista,<sup>b</sup> Alexandra R. Fernandes,<sup>\*b</sup> and Patrícia M. Reis<sup>\*a</sup>

<sup>a</sup> LAQV, Requimte, Departamento de Química, Faculdade de Ciências e Tecnologia, Universidade Nova de Lisboa, Caparica, 2829-516, Portugal

<sup>b</sup> UCIBIO, Departamento Ciências da Vida, Faculdade de Ciências e Tecnologia, Universidade Nova de Lisboa, Caparica, 2829-516, Portugal

\* P. M. Reis [preis@fct.unl.pt](mailto:preis@fct.unl.pt) ; A.R. Fernandes: [ma.fernandes@fct.unl.pt](mailto:ma.fernandes@fct.unl.pt)

### **1. Experimental Methods**

Proton nuclear magnetic resonance (<sup>1</sup>H NMR) spectra and carbon nuclear magnetic resonance (<sup>13</sup>C NMR) spectra were recorded on a Bruker Avance III 400 at 400 MHz and 100 MHz, respectively. All spectra were obtained in D<sub>2</sub>O, with exception of 2D <sup>1</sup>H-<sup>1</sup>H NOESY experiments, which were obtained in dmsd-d<sub>6</sub>. The NOESY were recorded also at Avance III, 400 MHz with a probe QNP, 400 MHz S<sub>1</sub>. Chemical shifts are expressed in ppm and *J* values are given in Hz. Proton chemical shifts are reported with the solvent reference (D<sub>2</sub>O, δ 4.79 ppm) or (dmsd-d<sub>6</sub>, δ 2.50 ppm).

Melting points were determined in a Stuart Scientific Melting Point SPM 1, at rate 3 °C/ min.

**Figure S1. Characterization data for ionic liquids**

**[C<sub>2</sub>Ch][C<sub>1</sub>SO<sub>3</sub>]**

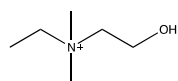

Viscous oil, <sup>1</sup>H NMR (D<sub>2</sub>O, 400 MHz): δ (ppm) 1.36-1.40 (m, 3H, CH<sub>3</sub>CH<sub>2</sub>N-); 2.82 (s, 3H, CH<sub>3</sub>SO<sub>3</sub>); 3.13 (s, 6H, -N(CH<sub>3</sub>)<sub>2</sub>); 3.45-3.51 (m, 4H, CH<sub>3</sub>CH<sub>2</sub>N-, -NCH<sub>2</sub>CH<sub>2</sub>OH); 4.04-4.08 (m, 2H, -NCH<sub>2</sub>CH<sub>2</sub>OH); <sup>13</sup>C NMR (D<sub>2</sub>O, 100 MHz): δ (ppm) 7.5 (CH<sub>3</sub>CH<sub>2</sub>N-); 38.5 (CH<sub>3</sub>SO<sub>3</sub>); 50.7 (t, *J* = 4.1 Hz, -NCH<sub>2</sub>CH<sub>2</sub>OH); 55.3 (-N(CH<sub>3</sub>)<sub>2</sub>); 61.0 (t, *J* = 2.1 Hz, CH<sub>3</sub>CH<sub>2</sub>N-); 64.4 (t, *J* = 2.1 Hz, -NCH<sub>2</sub>CH<sub>2</sub>OH)

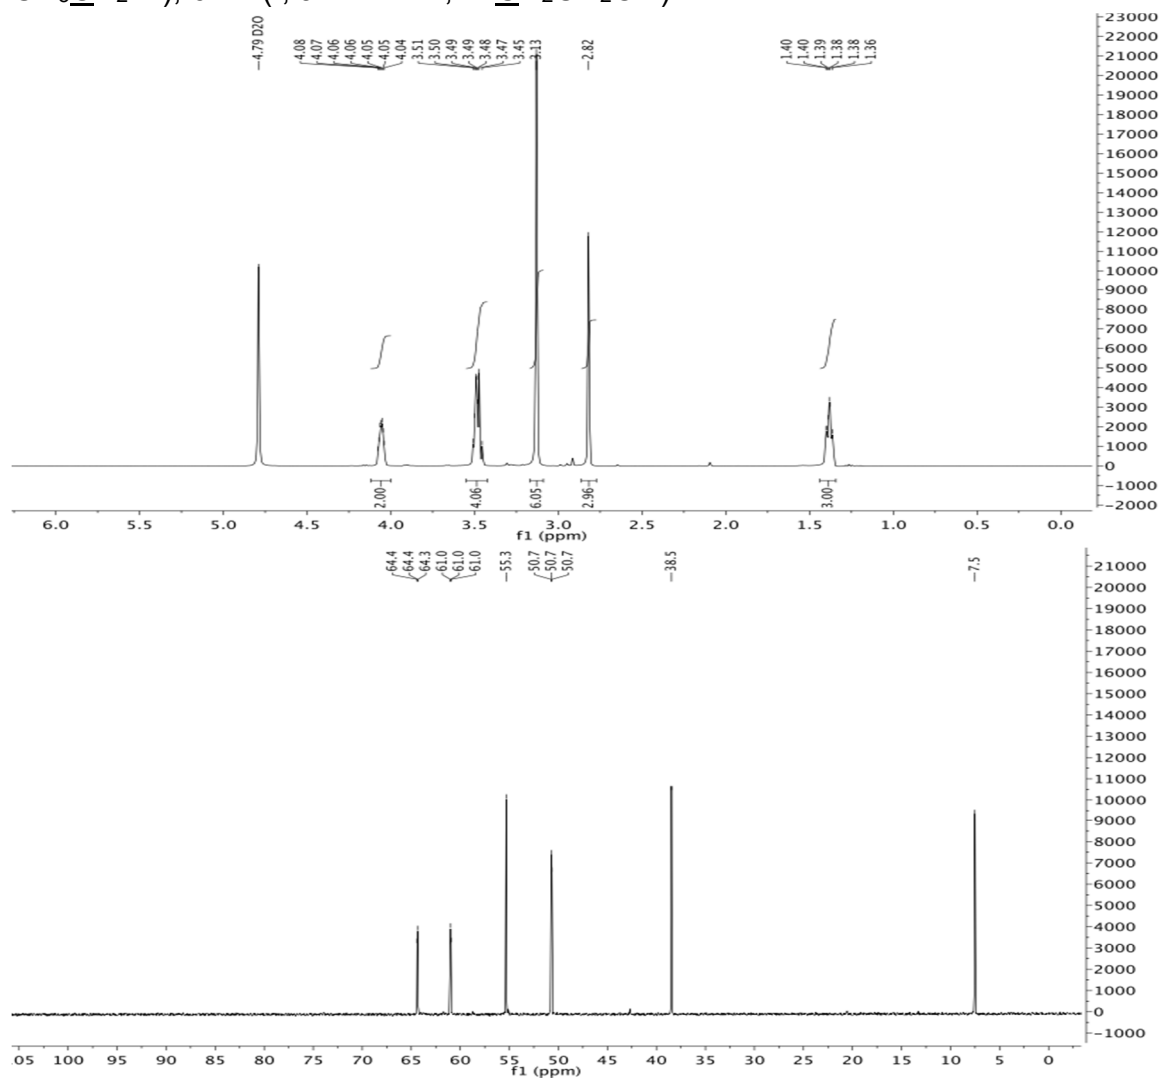

**[C<sub>2</sub>H][C<sub>2</sub>SO<sub>3</sub>]**

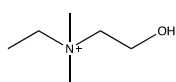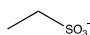

Viscous oil, <sup>1</sup>H NMR (D<sub>2</sub>O, 400 MHz): δ (ppm) 1.29 (t, 3H, *J* = 7.4 Hz, CH<sub>3</sub>CH<sub>2</sub>SO<sub>3</sub>); 1.36-1.41 (m, 3H, CH<sub>3</sub>CH<sub>2</sub>N-); 2.92 (q, 2H, *J* = 7.6 Hz, *J* = 14.9 Hz, CH<sub>3</sub>CH<sub>2</sub>SO<sub>3</sub>); 3.14 (s, 6H, -N(CH<sub>3</sub>)<sub>2</sub>); 3.46-3.51 (m, 4H, CH<sub>3</sub>CH<sub>2</sub>N-, -NCH<sub>2</sub>CH<sub>2</sub>OH); 4.04-4.08 (m, 2H, -NCH<sub>2</sub>CH<sub>2</sub>OH); <sup>13</sup>C NMR (D<sub>2</sub>O, 100 MHz): δ (ppm) 7.5 (CH<sub>3</sub>CH<sub>2</sub>N-); 8.4 (CH<sub>3</sub>CH<sub>2</sub>SO<sub>3</sub>); 45.4 (CH<sub>3</sub>CH<sub>2</sub>SO<sub>3</sub>); 50.7 (t, *J* = 3.8 Hz, -NCH<sub>2</sub>CH<sub>2</sub>OH); 55.3 (-N(CH<sub>3</sub>)<sub>2</sub>); 61.0 (t, *J* = 2.9 Hz, CH<sub>3</sub>CH<sub>2</sub>N-); 64.4 (t, *J* = 2.8 Hz, -NCH<sub>2</sub>CH<sub>2</sub>OH)

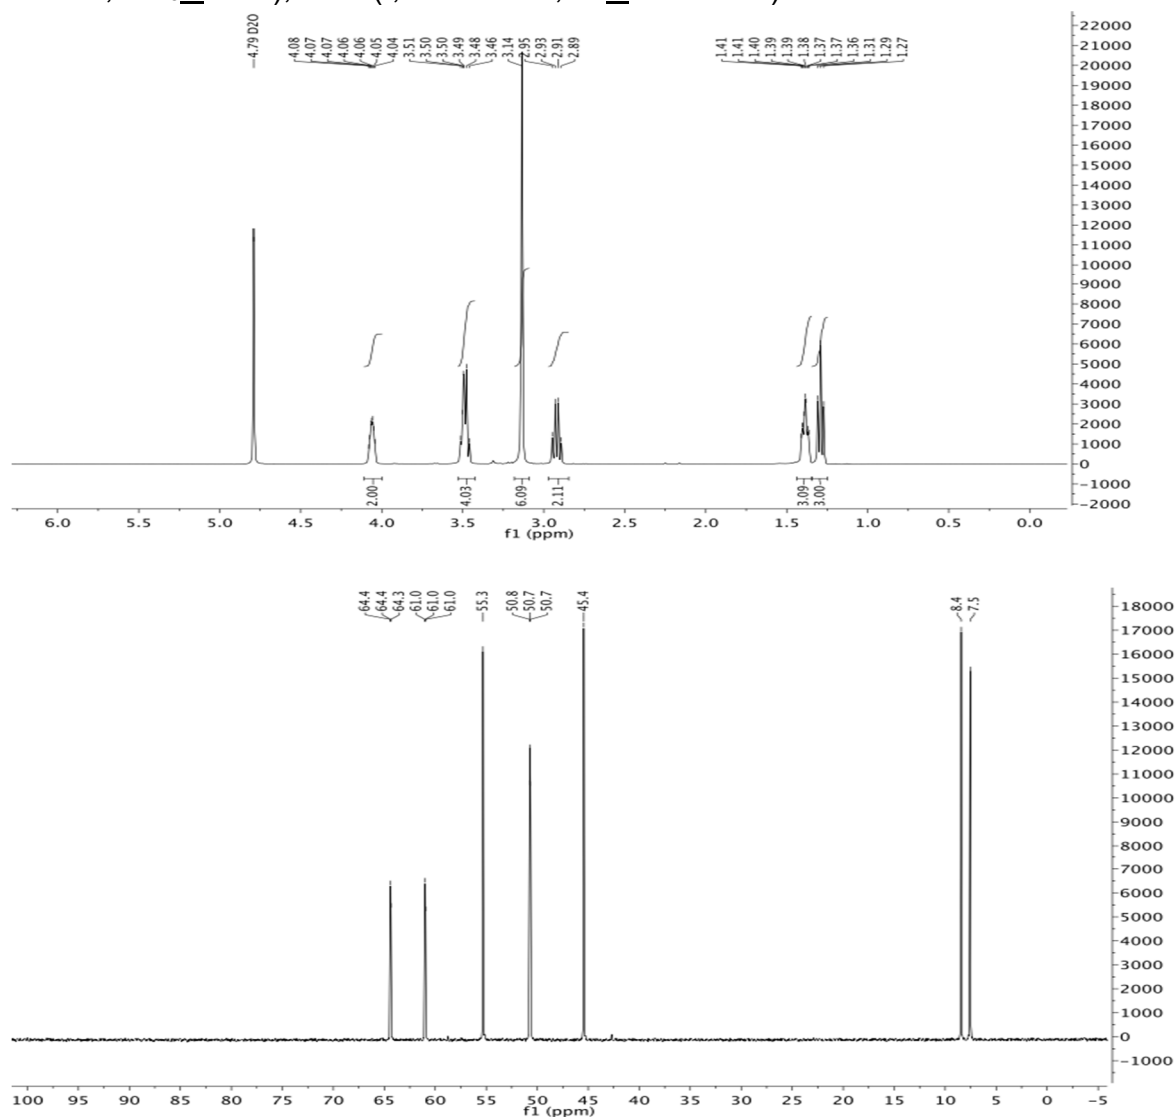

**[C<sub>2</sub>Ch][C<sub>4</sub>SO<sub>3</sub>]**

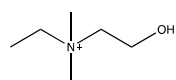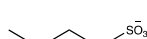

Viscous oil, <sup>1</sup>H NMR (D<sub>2</sub>O, 400 MHz): δ (ppm) 0.94 (t, 3H, *J* = 7.3 Hz, CH<sub>3</sub>CH<sub>2</sub>CH<sub>2</sub>CH<sub>2</sub>SO<sub>3</sub>); 1.36-4.7 (m, 5H, CH<sub>3</sub>CH<sub>2</sub>N-, CH<sub>3</sub>CH<sub>2</sub>CH<sub>2</sub>CH<sub>2</sub>SO<sub>3</sub>); 1.68-1.76 (m, 2H, CH<sub>3</sub>CH<sub>2</sub>CH<sub>2</sub>CH<sub>2</sub>SO<sub>3</sub>); 2.90-2.94 (m, 2H, CH<sub>3</sub>CH<sub>2</sub>CH<sub>2</sub>CH<sub>2</sub>SO<sub>3</sub>); 3.13 (s, 6H, -N(CH<sub>3</sub>)<sub>2</sub>); 3.46-3.51 (m, 4H, -NCH<sub>2</sub>CH<sub>2</sub>OH, CH<sub>3</sub>CH<sub>2</sub>N-); 4.04-4.07 (m, 2H, -NCH<sub>2</sub>CH<sub>2</sub>OH); <sup>13</sup>C NMR (D<sub>2</sub>O, 100 MHz): δ (ppm) 7.5 (CH<sub>3</sub>CH<sub>2</sub>N-); 12.9 (CH<sub>3</sub>CH<sub>2</sub>CH<sub>2</sub>CH<sub>2</sub>SO<sub>3</sub>); 21.1 (CH<sub>3</sub>CH<sub>2</sub>CH<sub>2</sub>CH<sub>2</sub>SO<sub>3</sub>); 26.2 (CH<sub>3</sub>CH<sub>2</sub>CH<sub>2</sub>CH<sub>2</sub>SO<sub>3</sub>); 50.7 (t, *J* = 3.9 Hz, -NCH<sub>2</sub>CH<sub>2</sub>OH); 50.9 (CH<sub>3</sub>CH<sub>2</sub>CH<sub>2</sub>CH<sub>2</sub>SO<sub>3</sub>); 55.3 (-N(CH<sub>3</sub>)<sub>2</sub>); 61.0 (t, *J* = 2.8 Hz, CH<sub>3</sub>CH<sub>2</sub>N-); 64.4 (t, *J* = 2.7 Hz, -NCH<sub>2</sub>CH<sub>2</sub>OH)

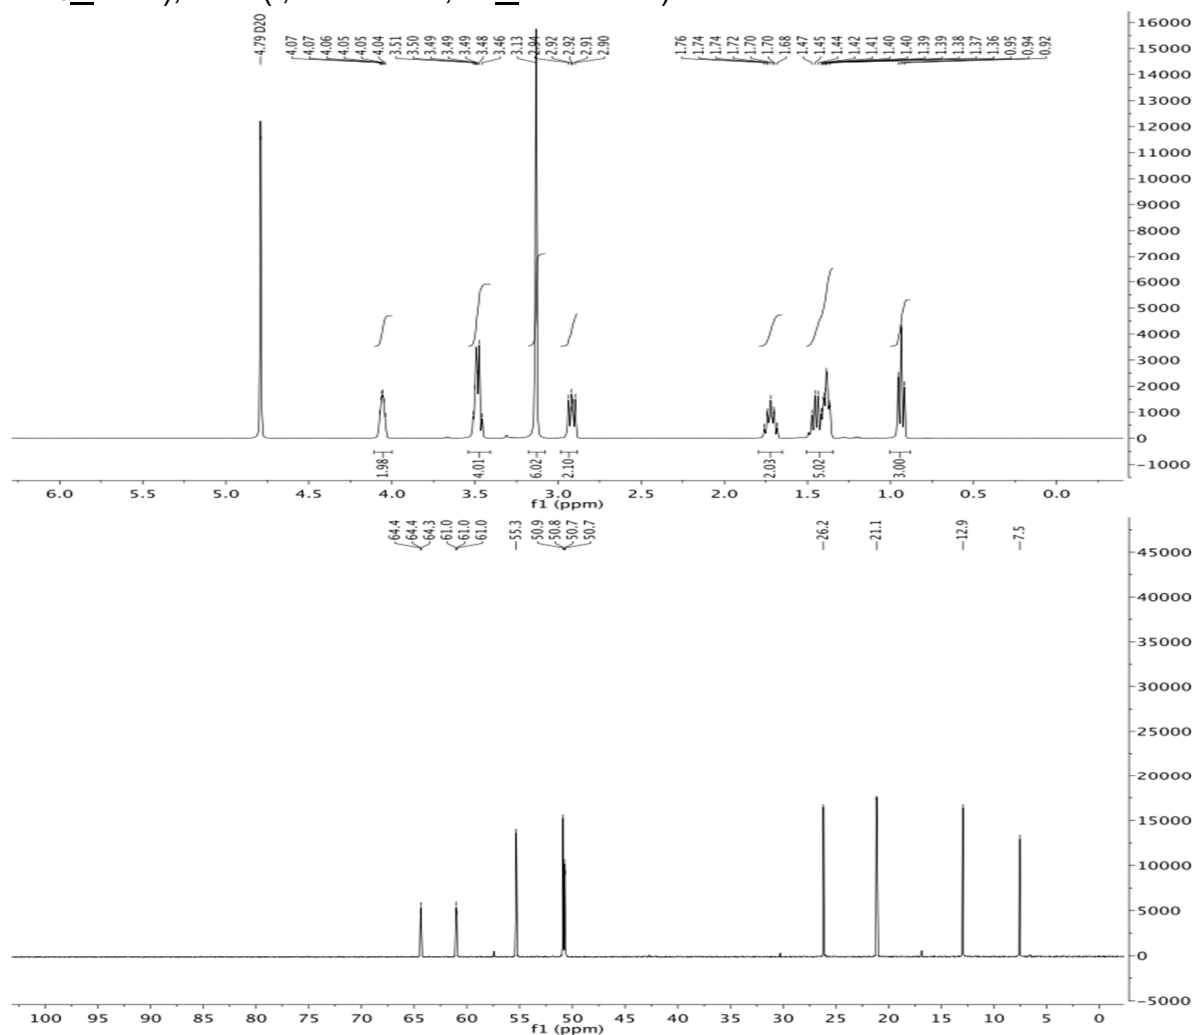

**[C<sub>3</sub>Ch][C<sub>1</sub>SO<sub>3</sub>]**

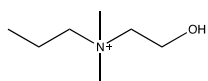

Viscous oil, <sup>1</sup>H NMR (D<sub>2</sub>O, 400 MHz): δ (ppm) 1.00 (t, 3H, *J* = 7.3 Hz, CH<sub>3</sub>CH<sub>2</sub>CH<sub>2</sub>N-); 1.78-1.88 (m, 2H, CH<sub>3</sub>CH<sub>2</sub>CH<sub>2</sub>N-); 2.83 (s, 3H, CH<sub>3</sub>SO<sub>3</sub>); 3.16 (s, 6H, -N(CH<sub>3</sub>)<sub>2</sub>); 3.34-3.38 (m, 2H, CH<sub>3</sub>CH<sub>2</sub>CH<sub>2</sub>N-); 3.49-3.52 (m, 2H, -NCH<sub>2</sub>CH<sub>2</sub>OH); 4.05-4.09 (m, 2H, -NCH<sub>2</sub>CH<sub>2</sub>OH); <sup>13</sup>C NMR (D<sub>2</sub>O, 100 MHz): δ (ppm) 7.5 (CH<sub>3</sub>CH<sub>2</sub>CH<sub>2</sub>N-); 15.7 (CH<sub>3</sub>CH<sub>2</sub>CH<sub>2</sub>N-); 38.5 (CH<sub>3</sub>SO<sub>3</sub>); 51.3 (t, *J* = 3.9 Hz, -NCH<sub>2</sub>CH<sub>2</sub>OH); 55.4 (-N(CH<sub>3</sub>)<sub>2</sub>); 64.9 (t, *J* = 2.9 Hz, CH<sub>3</sub>CH<sub>2</sub>CH<sub>2</sub>N-); 66.8 (t, *J* = 2.5 Hz, -NCH<sub>2</sub>CH<sub>2</sub>OH)

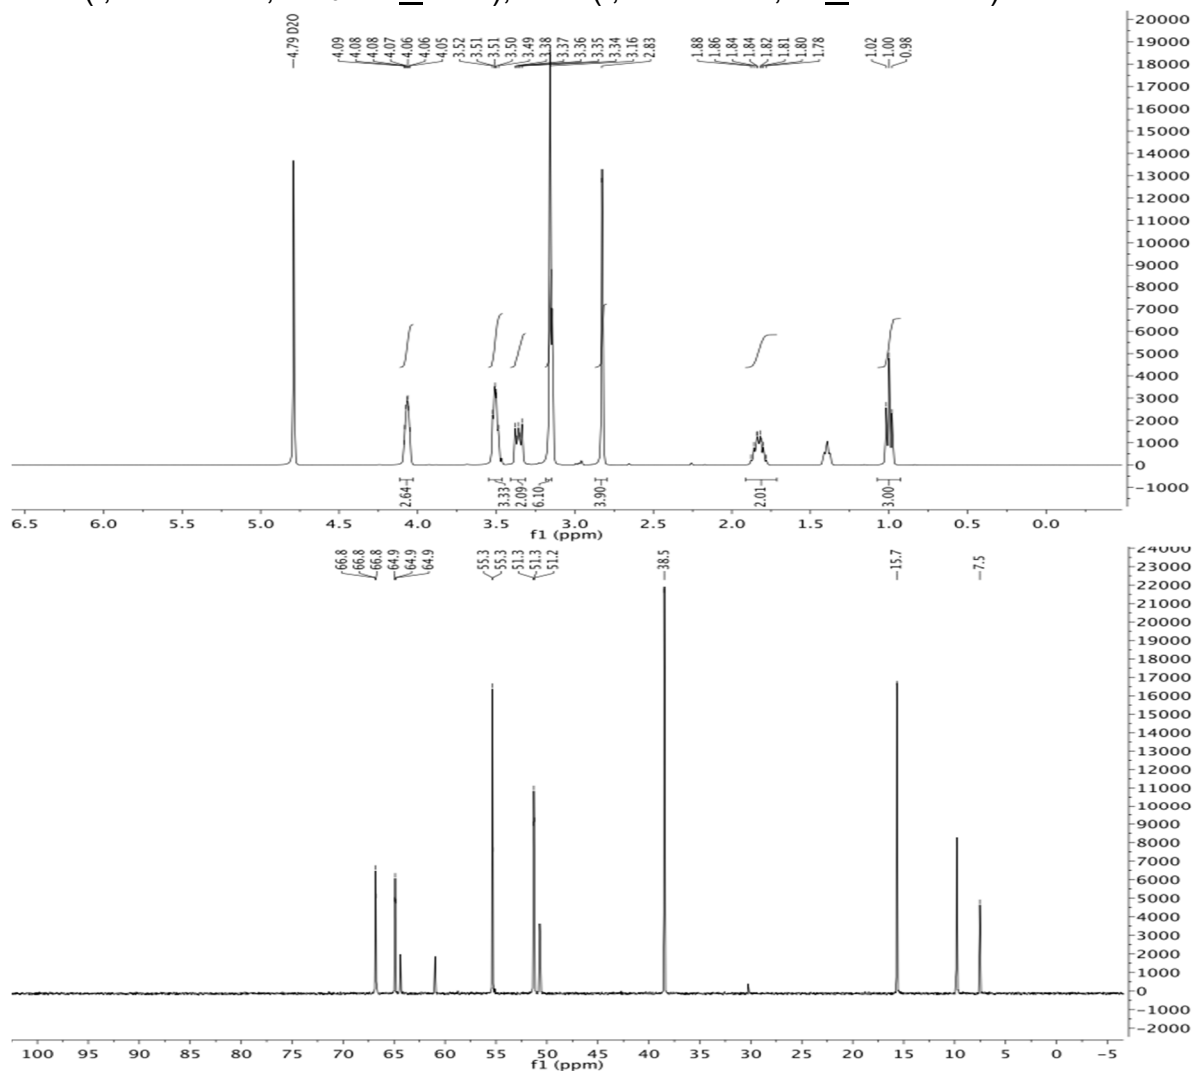

**[C<sub>3</sub>Ch][C<sub>2</sub>SO<sub>3</sub>]**

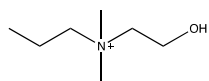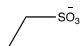

Viscous oil, <sup>1</sup>H NMR (D<sub>2</sub>O, 400 MHz): δ (ppm) 0.99 (t, 3H, *J* = 7.3 Hz, CH<sub>3</sub>CH<sub>2</sub>CH<sub>2</sub>N-); 1.29 (t, 3H, *J* = 7.3 Hz, CH<sub>3</sub>CH<sub>2</sub>SO<sub>3</sub>); 1.77-1.87 (m, 2H, CH<sub>3</sub>CH<sub>2</sub>CH<sub>2</sub>N-); 2.89-2.94 (m, 2H, CH<sub>3</sub>CH<sub>2</sub>SO<sub>3</sub>); 3.15 (s, 6H, -N(CH<sub>3</sub>)<sub>2</sub>); 3.32-3.37 (m, 2H, CH<sub>3</sub>CH<sub>2</sub>CH<sub>2</sub>N-); 3.46-3.51 (m, 2H, -NCH<sub>2</sub>CH<sub>2</sub>OH); 4.04-4.07 (m, 2H, -NCH<sub>2</sub>CH<sub>2</sub>OH); <sup>13</sup>C NMR (D<sub>2</sub>O, 100 MHz): δ (ppm) 7.5 (CH<sub>3</sub>CH<sub>2</sub>CH<sub>2</sub>N-); 8.4 (CH<sub>3</sub>CH<sub>2</sub>SO<sub>3</sub>); 15.7 (CH<sub>3</sub>CH<sub>2</sub>CH<sub>2</sub>N-); 45.4 (CH<sub>3</sub>CH<sub>2</sub>SO<sub>3</sub>); 51.3 (t, *J* = 3.7 Hz, -NCH<sub>2</sub>CH<sub>2</sub>OH); 55.3 (-N(CH<sub>3</sub>)<sub>2</sub>); 64.9 (t, *J* = 2.9 Hz, CH<sub>3</sub>CH<sub>2</sub>CH<sub>2</sub>N-); 66.8 (t, *J* = 2.5 Hz, -NCH<sub>2</sub>CH<sub>2</sub>OH)

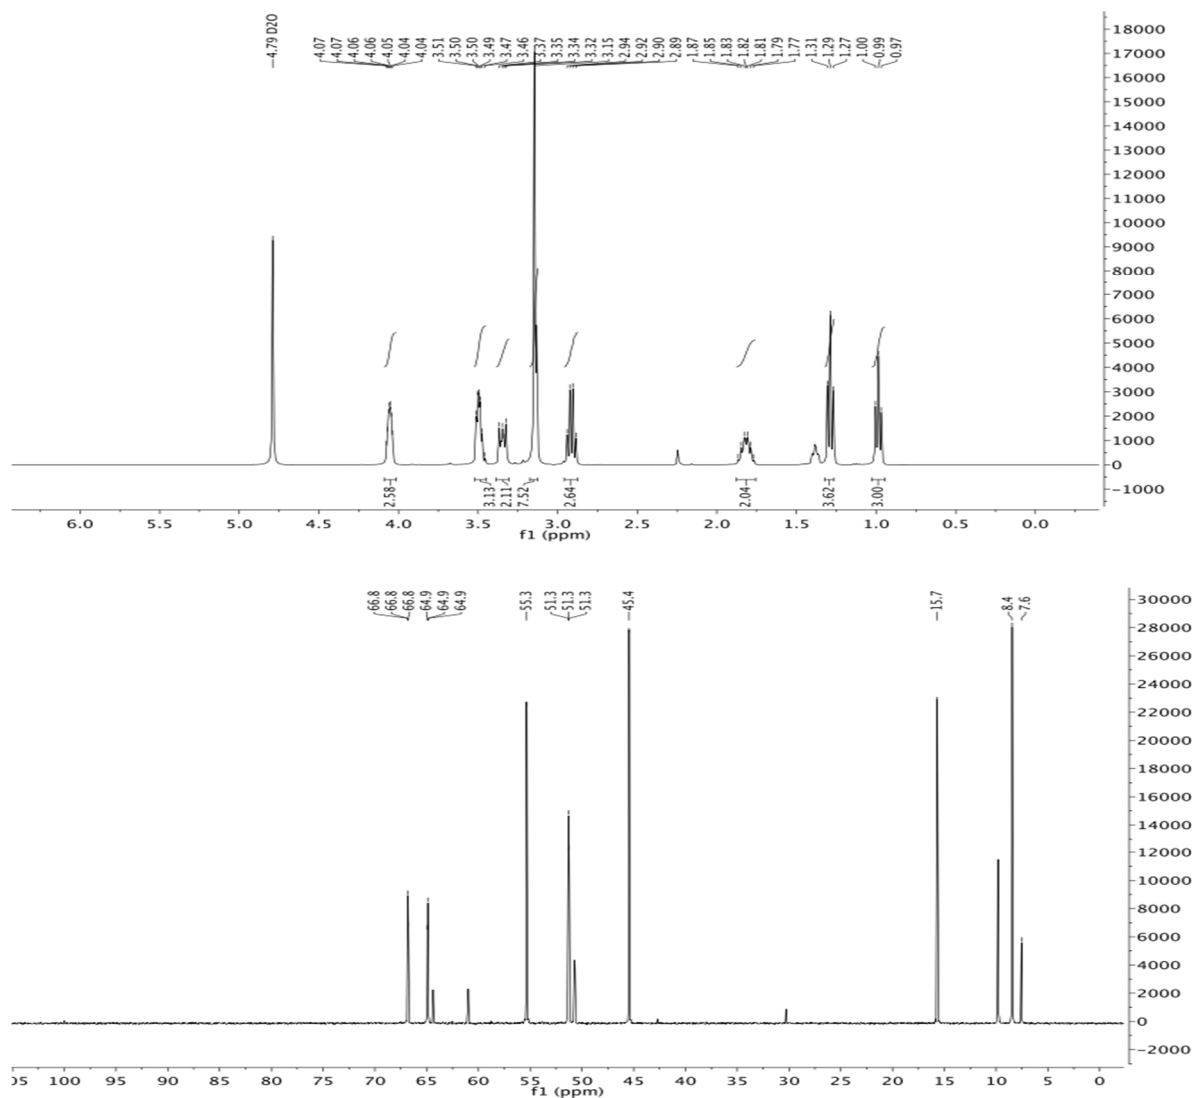

**[C<sub>3</sub>Ch][C<sub>4</sub>SO<sub>3</sub>]**

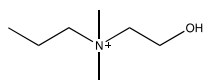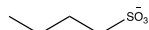

Viscous oil, <sup>1</sup>H NMR (D<sub>2</sub>O, 400 MHz): δ (ppm) 0.91-1.00 (m, 6H, CH<sub>3</sub>CH<sub>2</sub>CH<sub>2</sub>N-, CH<sub>3</sub>CH<sub>2</sub>CH<sub>2</sub>CH<sub>2</sub>SO<sub>3</sub>); 1.36-1.45 (m, 4H, CH<sub>3</sub>CH<sub>2</sub>CH<sub>2</sub>CH<sub>2</sub>SO<sub>3</sub>, CH<sub>3</sub>CH<sub>2</sub>CH<sub>2</sub>CH<sub>2</sub>SO<sub>3</sub>); 1.69-1.84 (m, 2H, CH<sub>3</sub>CH<sub>2</sub>CH<sub>2</sub>N-); 2.89-2.93 (m, 2H, CH<sub>3</sub>CH<sub>2</sub>CH<sub>2</sub>CH<sub>2</sub>SO<sub>3</sub>); 3.14 (s, 6H-N(CH<sub>3</sub>)<sub>2</sub>); 3.32-3.36 (m, 2H, CH<sub>3</sub>CH<sub>2</sub>CH<sub>2</sub>N-); 3.47-3.50 (m, 2H, -NCH<sub>2</sub>CH<sub>2</sub>OH); 4.04-4.06 (m, 2H, -NCH<sub>2</sub>CH<sub>2</sub>OH); <sup>13</sup>C NMR (D<sub>2</sub>O, 100 MHz): δ (ppm) 9.8 (CH<sub>3</sub>CH<sub>2</sub>CH<sub>2</sub>N-); 12.9 (CH<sub>3</sub>CH<sub>2</sub>CH<sub>2</sub>CH<sub>2</sub>SO<sub>3</sub>); 15.7 CH<sub>3</sub>CH<sub>2</sub>CH<sub>2</sub>N-); 21.1 (CH<sub>3</sub>CH<sub>2</sub>CH<sub>2</sub>CH<sub>2</sub>SO<sub>3</sub>); 26.1 (CH<sub>3</sub>CH<sub>2</sub>CH<sub>2</sub>CH<sub>2</sub>SO<sub>3</sub>); 50.8 (CH<sub>3</sub>CH<sub>2</sub>CH<sub>2</sub>CH<sub>2</sub>SO<sub>3</sub>); 51.3 (t, J = 4.0 Hz, -NCH<sub>2</sub>CH<sub>2</sub>OH); 55.3 (-N(CH<sub>3</sub>)<sub>2</sub>); 64.9 (t, J = 2.8 Hz, CH<sub>3</sub>CH<sub>2</sub>CH<sub>2</sub>N-); 66.8 (t, J = 2.7 Hz, -NCH<sub>2</sub>CH<sub>2</sub>OH)

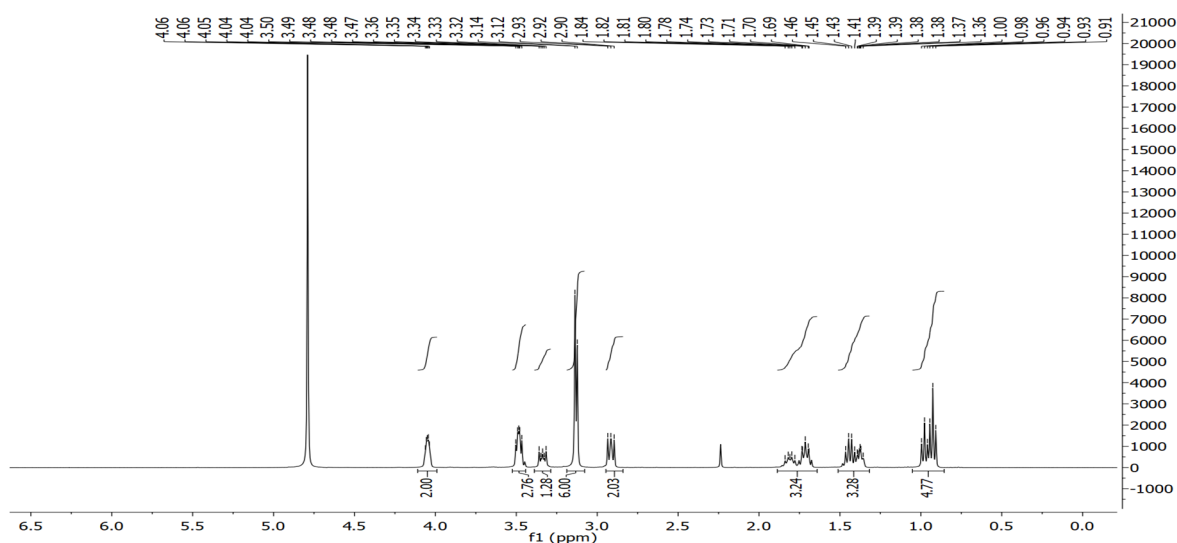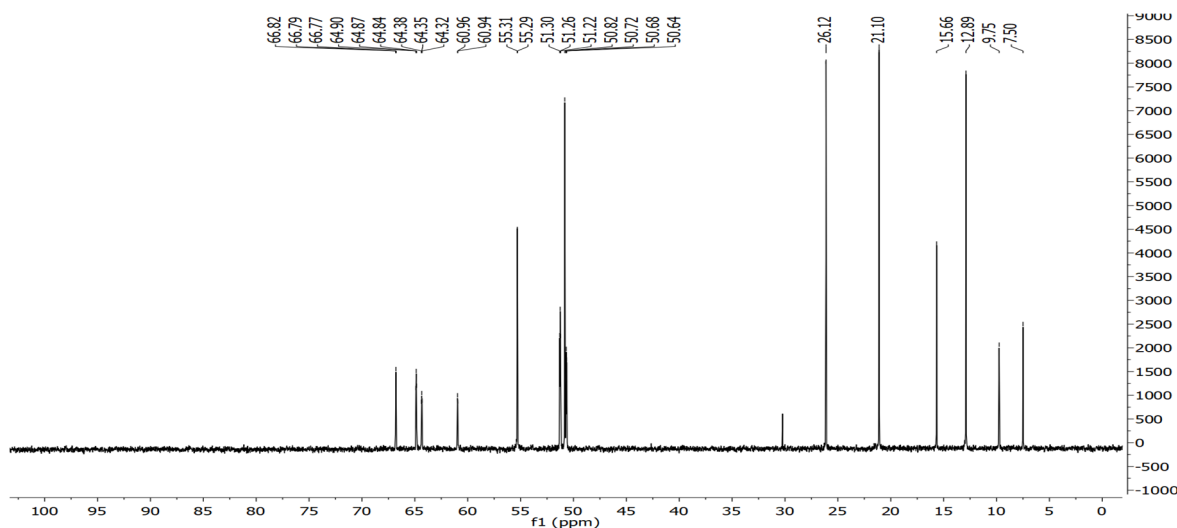

**[C<sub>4</sub>H][C<sub>1</sub>SO<sub>3</sub>]**

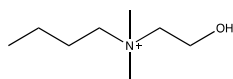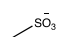

Viscous oil, <sup>1</sup>H NMR (D<sub>2</sub>O, 400 MHz): δ (ppm) 0.98 (t, 3H, *J* = 6.3 Hz, CH<sub>3</sub>CH<sub>2</sub>CH<sub>2</sub>CH<sub>2</sub>N-); 1.36-1.46 (m, 2H, CH<sub>3</sub>CH<sub>2</sub>CH<sub>2</sub>CH<sub>2</sub>N-); 1.75-1.83 (m, 2H, CH<sub>3</sub>CH<sub>2</sub>CH<sub>2</sub>CH<sub>2</sub>N-); 2.82 (s, 3H, CH<sub>3</sub>SO<sub>3</sub>); 3.15 (s, 6H, -N(CH<sub>3</sub>)<sub>2</sub>); 3.38-3.42 (m, 2H, CH<sub>3</sub>CH<sub>2</sub>CH<sub>2</sub>CH<sub>2</sub>N-); 3.49-3.53 (m, 2H, -NCH<sub>2</sub>CH<sub>2</sub>OH); 4.04-4.08 (m, 2H, -NCH<sub>2</sub>CH<sub>2</sub>OH); <sup>13</sup>C NMR (D<sub>2</sub>O, 100 MHz): δ (ppm) 12.9 (CH<sub>3</sub>CH<sub>2</sub>CH<sub>2</sub>CH<sub>2</sub>N-); 19.1 (CH<sub>3</sub>CH<sub>2</sub>CH<sub>2</sub>CH<sub>2</sub>N-); 23.9 (CH<sub>3</sub>CH<sub>2</sub>CH<sub>2</sub>CH<sub>2</sub>N-); 38.6 CH<sub>3</sub>SO<sub>3</sub>; 51.3 (t, *J* = 3.9 Hz, -NCH<sub>2</sub>CH<sub>2</sub>OH); 55.4 (-N(CH<sub>3</sub>)<sub>2</sub>); 64.8 (t, *J* = 2.8 Hz, CH<sub>3</sub>CH<sub>2</sub>CH<sub>2</sub>CH<sub>2</sub>N-); 65.3 (t, *J* = 2.7 Hz, -NCH<sub>2</sub>CH<sub>2</sub>OH)

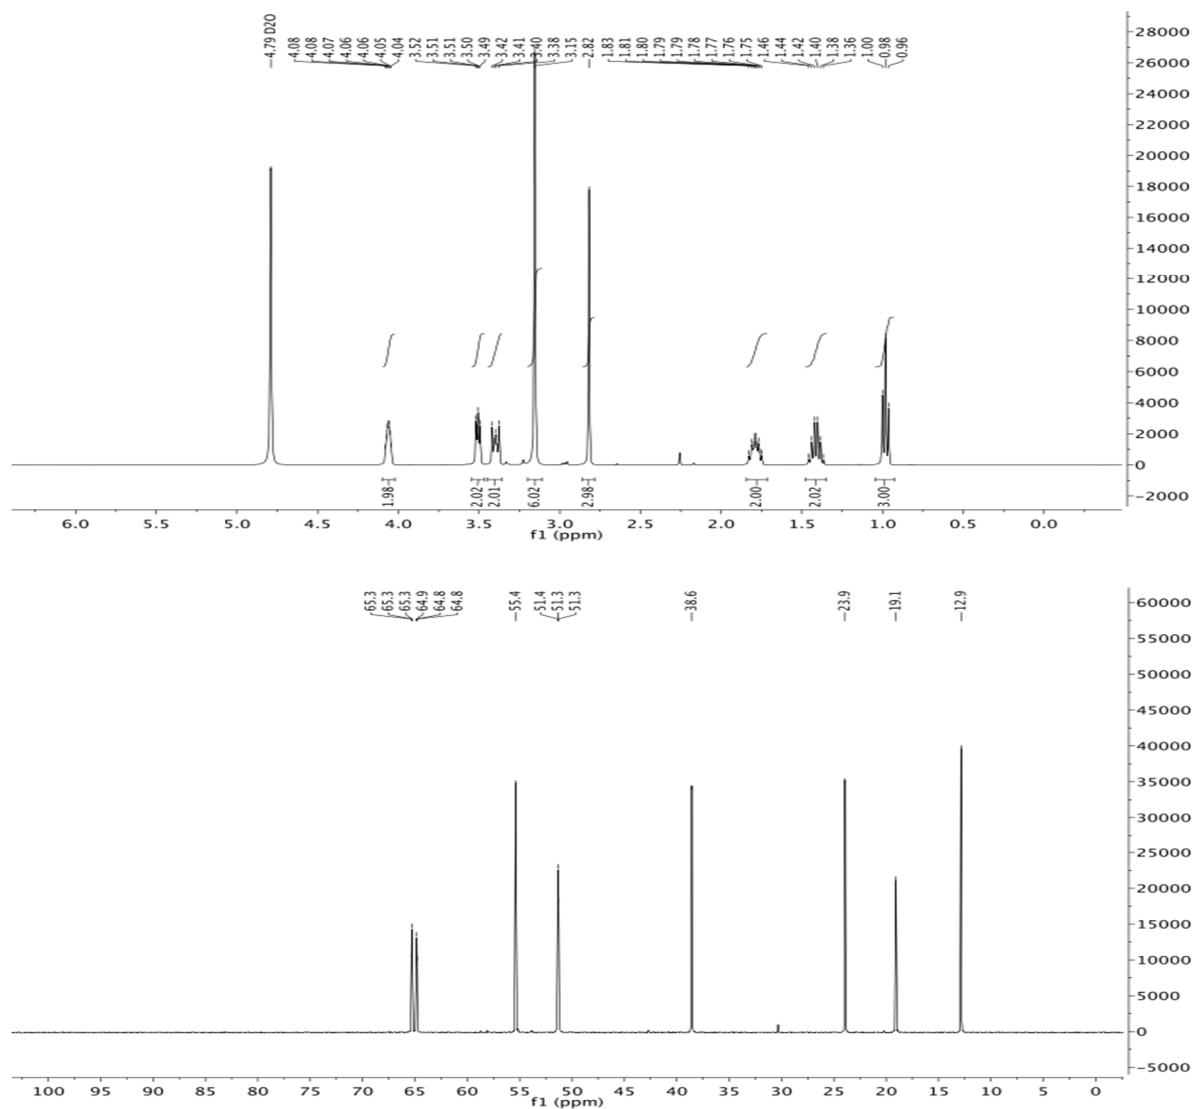



**[C<sub>4</sub>Ch][C<sub>2</sub>SO<sub>3</sub>]**

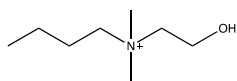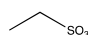

Viscous oil, <sup>1</sup>H NMR (D<sub>2</sub>O, 400 MHz): δ (ppm) 0.96 (t, 3H, *J* = 6.8 Hz, CH<sub>3</sub>CH<sub>2</sub>CH<sub>2</sub>CH<sub>2</sub>N-); 1.28 (t, 3H, *J* = 7.3 Hz, CH<sub>3</sub>CH<sub>2</sub>SO<sub>3</sub>); 1.35-1.44 (m, 2H, CH<sub>3</sub>CH<sub>2</sub>CH<sub>2</sub>CH<sub>2</sub>N-); 1.75-1.81 (m, 2H, CH<sub>3</sub>CH<sub>2</sub>CH<sub>2</sub>CH<sub>2</sub>N-); 2.91 (q, 2H, *J* = 7.3 Hz, *J* = 14.5 Hz, CH<sub>3</sub>CH<sub>2</sub>SO<sub>3</sub>); 3.14 (s, 6H, -N(CH<sub>3</sub>)<sub>2</sub>); 3.36-3.40 (m, 2H, CH<sub>3</sub>CH<sub>2</sub>CH<sub>2</sub>CH<sub>2</sub>N-NCH<sub>2</sub>CH<sub>2</sub>OH); 3.49 (t, 2H, *J* = 4.0 Hz, -NCH<sub>2</sub>CH<sub>2</sub>OH); 4.03-4.07 (m, 2H, -NCH<sub>2</sub>CH<sub>2</sub>OH); <sup>13</sup>C NMR (D<sub>2</sub>O, 100 MHz): δ (ppm) 8.4 (CH<sub>3</sub>CH<sub>2</sub>SO<sub>3</sub>); 12.8 (CH<sub>3</sub>CH<sub>2</sub>CH<sub>2</sub>CH<sub>2</sub>N-); 19.1 (CH<sub>3</sub>CH<sub>2</sub>CH<sub>2</sub>CH<sub>2</sub>N-); 23.9 (CH<sub>3</sub>CH<sub>2</sub>CH<sub>2</sub>CH<sub>2</sub>N-); 45.4 (CH<sub>3</sub>CH<sub>2</sub>SO<sub>3</sub>); 51.3 (t, *J* = 3.6 Hz, -NCH<sub>2</sub>CH<sub>2</sub>OH); 55.4 (-N(CH<sub>3</sub>)<sub>2</sub>); 64.8 (t, *J* = 2.9 Hz, CH<sub>3</sub>CH<sub>2</sub>CH<sub>2</sub>CH<sub>2</sub>N-); 65.3 (t, *J* = 2.7 Hz, -NCH<sub>2</sub>CH<sub>2</sub>OH)

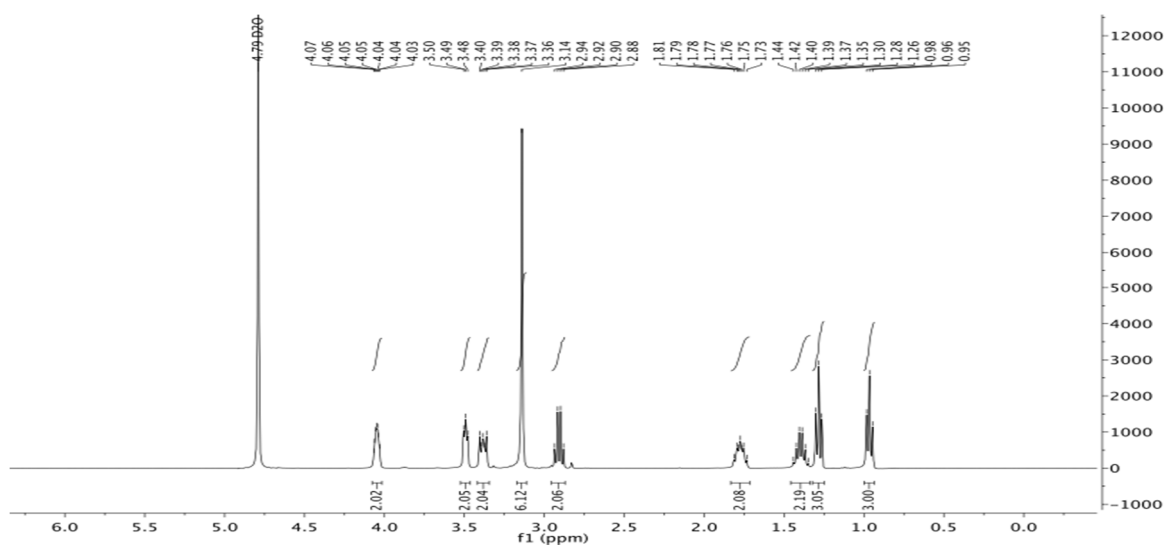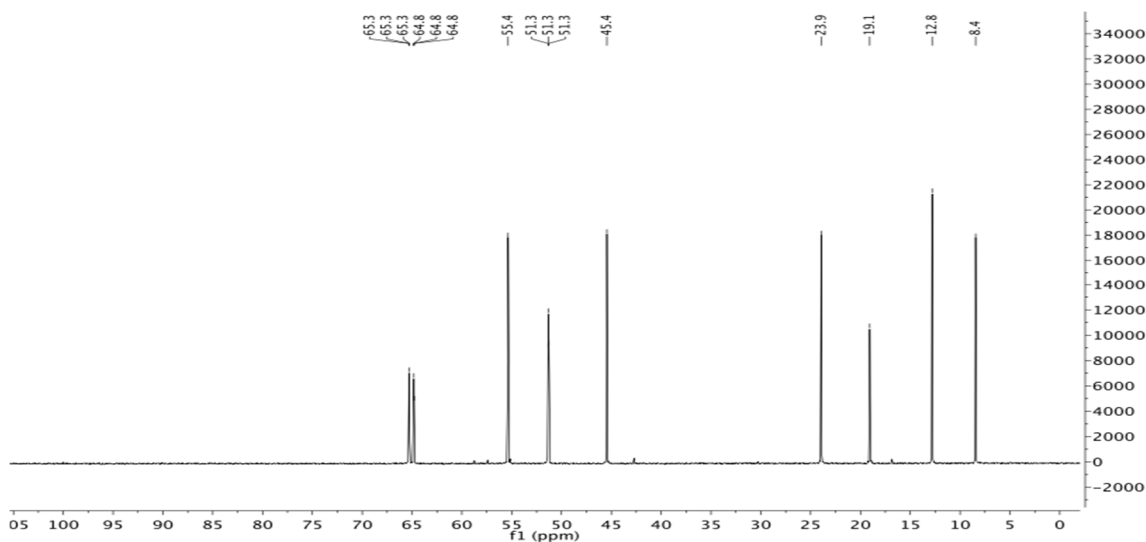

**[C<sub>4</sub>H][C<sub>4</sub>SO<sub>3</sub>]**

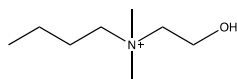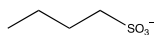

Yellowish solid, m.p 47.2-48.5 °C, <sup>1</sup>H NMR (D<sub>2</sub>O, 400

MHz): δ (ppm) 0.91-0.99 (m, 6H, CH<sub>3</sub>CH<sub>2</sub>CH<sub>2</sub>CH<sub>2</sub>SO<sub>3</sub>, CH<sub>3</sub>CH<sub>2</sub>CH<sub>2</sub>CH<sub>2</sub>N-); 1.35-1.49

(m, 4H, CH<sub>3</sub>CH<sub>2</sub>CH<sub>2</sub>CH<sub>2</sub>SO<sub>3</sub>, CH<sub>3</sub>CH<sub>2</sub>CH<sub>2</sub>CH<sub>2</sub>N-); 1.68-1.82 (m, 4H, CH<sub>3</sub>CH<sub>2</sub>CH<sub>2</sub>CH<sub>2</sub>SO<sub>3</sub>, CH<sub>3</sub>CH<sub>2</sub>CH<sub>2</sub>CH<sub>2</sub>N-); 2.89-2.93 (m, 2H, CH<sub>3</sub>CH<sub>2</sub>CH<sub>2</sub>CH<sub>2</sub>SO<sub>3</sub>); 3.14 (s, 6H, -N(CH<sub>3</sub>)<sub>2</sub>); 3.36-3.41 (m, 2H, CH<sub>3</sub>CH<sub>2</sub>CH<sub>2</sub>CH<sub>2</sub>N-); 3.48-3.51 (m, 2H, -NCH<sub>2</sub>CH<sub>2</sub>OH); 4.03-4.07 (m, 2H, -NCH<sub>2</sub>CH<sub>2</sub>OH); <sup>13</sup>C NMR (D<sub>2</sub>O, 100 MHz): δ (ppm) 12.8 (CH<sub>3</sub>CH<sub>2</sub>CH<sub>2</sub>CH<sub>2</sub>SO<sub>3</sub>); 12.9 (CH<sub>3</sub>CH<sub>2</sub>CH<sub>2</sub>CH<sub>2</sub>N-); 19.1 (CH<sub>3</sub>CH<sub>2</sub>CH<sub>2</sub>CH<sub>2</sub>N-); 21.1 (CH<sub>3</sub>CH<sub>2</sub>CH<sub>2</sub>CH<sub>2</sub>N-); 23.9 (CH<sub>3</sub>CH<sub>2</sub>CH<sub>2</sub>CH<sub>2</sub>SO<sub>3</sub>); 26.1 (CH<sub>3</sub>CH<sub>2</sub>CH<sub>2</sub>CH<sub>2</sub>SO<sub>3</sub>); 50.9 (CH<sub>3</sub>CH<sub>2</sub>CH<sub>2</sub>CH<sub>2</sub>SO<sub>3</sub>); 51.3 (t, *J* = 3.9 Hz, -NCH<sub>2</sub>CH<sub>2</sub>OH); 55.3 (-N(CH<sub>3</sub>)<sub>2</sub>); 64.8 (t, *J* = 2.8 Hz, CH<sub>3</sub>CH<sub>2</sub>CH<sub>2</sub>CH<sub>2</sub>N-); 65.3 (t, *J* = 2.2 Hz, -NCH<sub>2</sub>CH<sub>2</sub>OH)

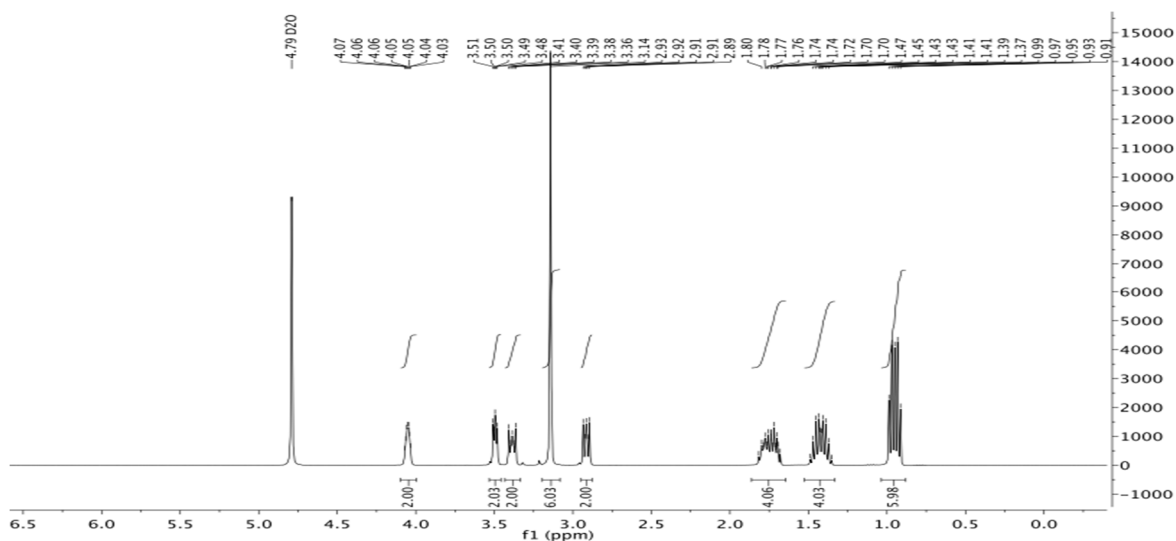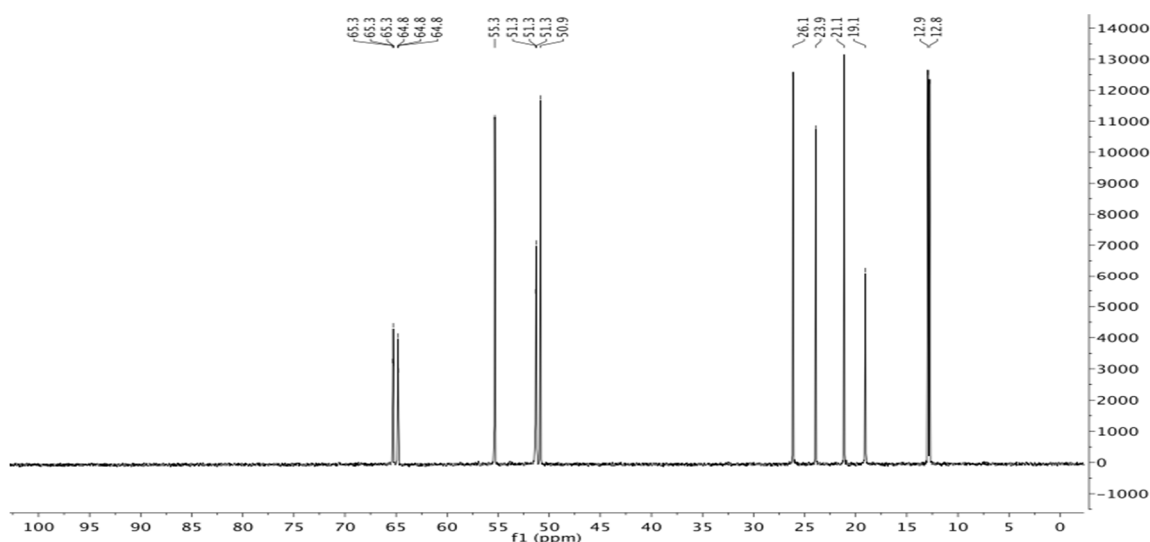

**[C<sub>5</sub>Ch][C<sub>1</sub>SO<sub>3</sub>]**

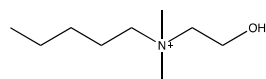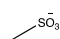

Viscous oil, <sup>1</sup>H NMR (D<sub>2</sub>O, 400 MHz): δ (ppm) 0.92 (t, 3H, *J* = 6.4 Hz, CH<sub>3</sub>CH<sub>2</sub>CH<sub>2</sub>CH<sub>2</sub>CH<sub>2</sub>N<sup>-</sup>); 1.34-1.43 (m, 4H, CH<sub>3</sub>CH<sub>2</sub>CH<sub>2</sub>CH<sub>2</sub>CH<sub>2</sub>N<sup>-</sup>); 1.77-1.84 (m, 2H, CH<sub>3</sub>CH<sub>2</sub>CH<sub>2</sub>CH<sub>2</sub>CH<sub>2</sub>N<sup>-</sup>); 2.82 (s, 3H, CH<sub>3</sub>SO<sub>3</sub><sup>-</sup>); 3.15 (s, 6H, -N(CH<sub>3</sub>)<sub>2</sub>); 3.36-3.41 (m, 2H, CH<sub>3</sub>CH<sub>2</sub>CH<sub>2</sub>CH<sub>2</sub>CH<sub>2</sub>N<sup>-</sup>); 3.48-3.52 (m, 2H, -NCH<sub>2</sub>CH<sub>2</sub>OH); 4.04-4.07 (m, 2H, -NCH<sub>2</sub>CH<sub>2</sub>OH); <sup>13</sup>C NMR (D<sub>2</sub>O, 100 MHz): δ (ppm) 13.1 (CH<sub>3</sub>CH<sub>2</sub>CH<sub>2</sub>CH<sub>2</sub>CH<sub>2</sub>N<sup>-</sup>); 21.5 (CH<sub>3</sub>CH<sub>2</sub>CH<sub>2</sub>CH<sub>2</sub>CH<sub>2</sub>N<sup>-</sup>); 21.6 (CH<sub>3</sub>CH<sub>2</sub>CH<sub>2</sub>CH<sub>2</sub>CH<sub>2</sub>N<sup>-</sup>); 27.6 (CH<sub>3</sub>CH<sub>2</sub>CH<sub>2</sub>CH<sub>2</sub>CH<sub>2</sub>N<sup>-</sup>); 38.5 (CH<sub>3</sub>SO<sub>3</sub><sup>-</sup>); 51.3 (t, *J* = 3.6 Hz, -NCH<sub>2</sub>CH<sub>2</sub>OH); 55.4 (-N(CH<sub>3</sub>)<sub>2</sub>); 64.8 (t, *J* = 2.7 Hz, CH<sub>3</sub>CH<sub>2</sub>CH<sub>2</sub>CH<sub>2</sub>CH<sub>2</sub>N<sup>-</sup>); 65.8 (t, *J* = 2.9 Hz, -NCH<sub>2</sub>CH<sub>2</sub>OH)

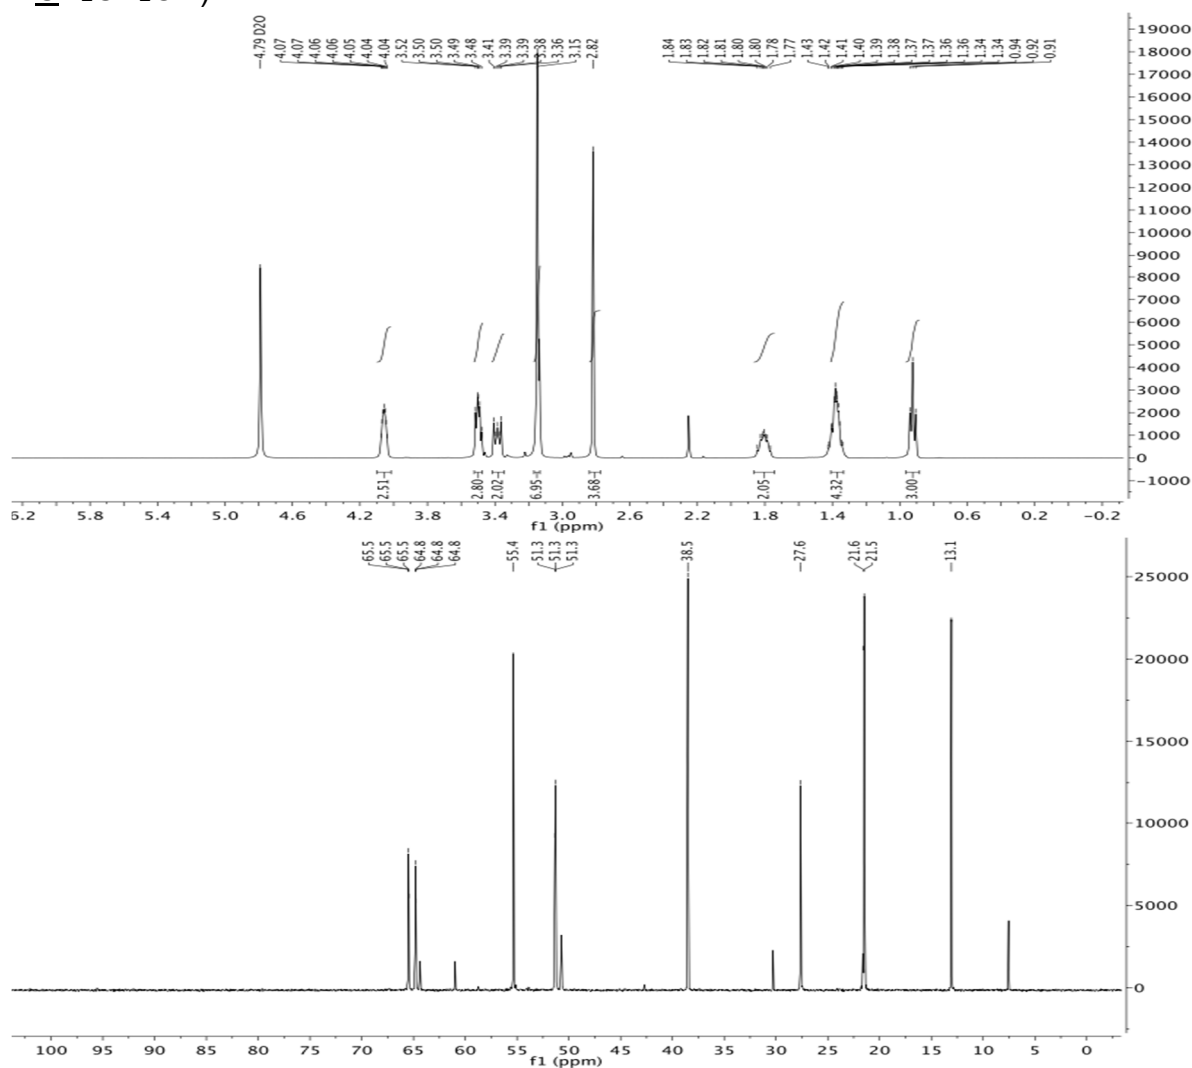

**[C<sub>5</sub>H][C<sub>2</sub>SO<sub>3</sub>]**

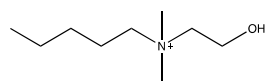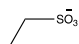

Viscous oil, <sup>1</sup>H NMR (D<sub>2</sub>O, 400 MHz): δ (ppm) 0.92 (t, 3H,  $J = 6.5$  Hz,  $\text{CH}_3\text{CH}_2\text{CH}_2\text{CH}_2\text{CH}_2\text{N}^-$ ); 1.29 (t, 3H,  $J = 7.2$  Hz,  $\text{CH}_3\text{CH}_2\text{SO}_3$ ); 1.34-1.41 (m, 4H,  $\text{CH}_3\text{CH}_2\text{CH}_2\text{CH}_2\text{CH}_2\text{N}^-$ ); 1.77-1.84 (m, 2H,  $\text{CH}_3\text{CH}_2\text{CH}_2\text{CH}_2\text{CH}_2\text{N}^-$ ); 2.91 (q, 2H,  $J = 7.3$  Hz,  $J = 14.8$  Hz,  $\text{CH}_3\text{CH}_2\text{SO}_3$ ); 3.15 (s, 6H,  $-\text{N}(\text{CH}_3)_2$ ); 3.36-3.41 (m, 2H,  $\text{CH}_3\text{CH}_2\text{CH}_2\text{CH}_2\text{CH}_2\text{N}^-$ ); 3.48-3.51 (m, 2H,  $-\text{NCH}_2\text{CH}_2\text{OH}$ ); 4.04-4.07 (m, 2H,  $-\text{NCH}_2\text{CH}_2\text{OH}$ ); <sup>13</sup>C NMR (D<sub>2</sub>O, 100 MHz): δ (ppm) 8.5 ( $\text{CH}_3\text{CH}_2\text{SO}_3$ ); 13.1 ( $\text{CH}_3\text{CH}_2\text{CH}_2\text{CH}_2\text{CH}_2\text{N}^-$ ); 21.5 ( $\text{CH}_3\text{CH}_2\text{CH}_2\text{CH}_2\text{CH}_2\text{N}^-$ ); 21.6 ( $\text{CH}_3\text{CH}_2\text{CH}_2\text{CH}_2\text{CH}_2\text{N}^-$ ); 27.6 ( $\text{CH}_3\text{CH}_2\text{CH}_2\text{CH}_2\text{CH}_2\text{N}^-$ ); 45.5 ( $\text{CH}_3\text{CH}_2\text{SO}_3$ ); 51.3 (t,  $J = 3.6$  Hz,  $-\text{NCH}_2\text{CH}_2\text{OH}$ ); 55.3 ( $-\text{N}(\text{CH}_3)_2$ ); 64.8 (t,  $J = 2.7$  Hz,  $\text{CH}_3\text{CH}_2\text{CH}_2\text{CH}_2\text{CH}_2\text{N}^-$ ); 65.5 (t,  $J = 2.9$  Hz,  $-\text{NCH}_2\text{CH}_2\text{OH}$ )

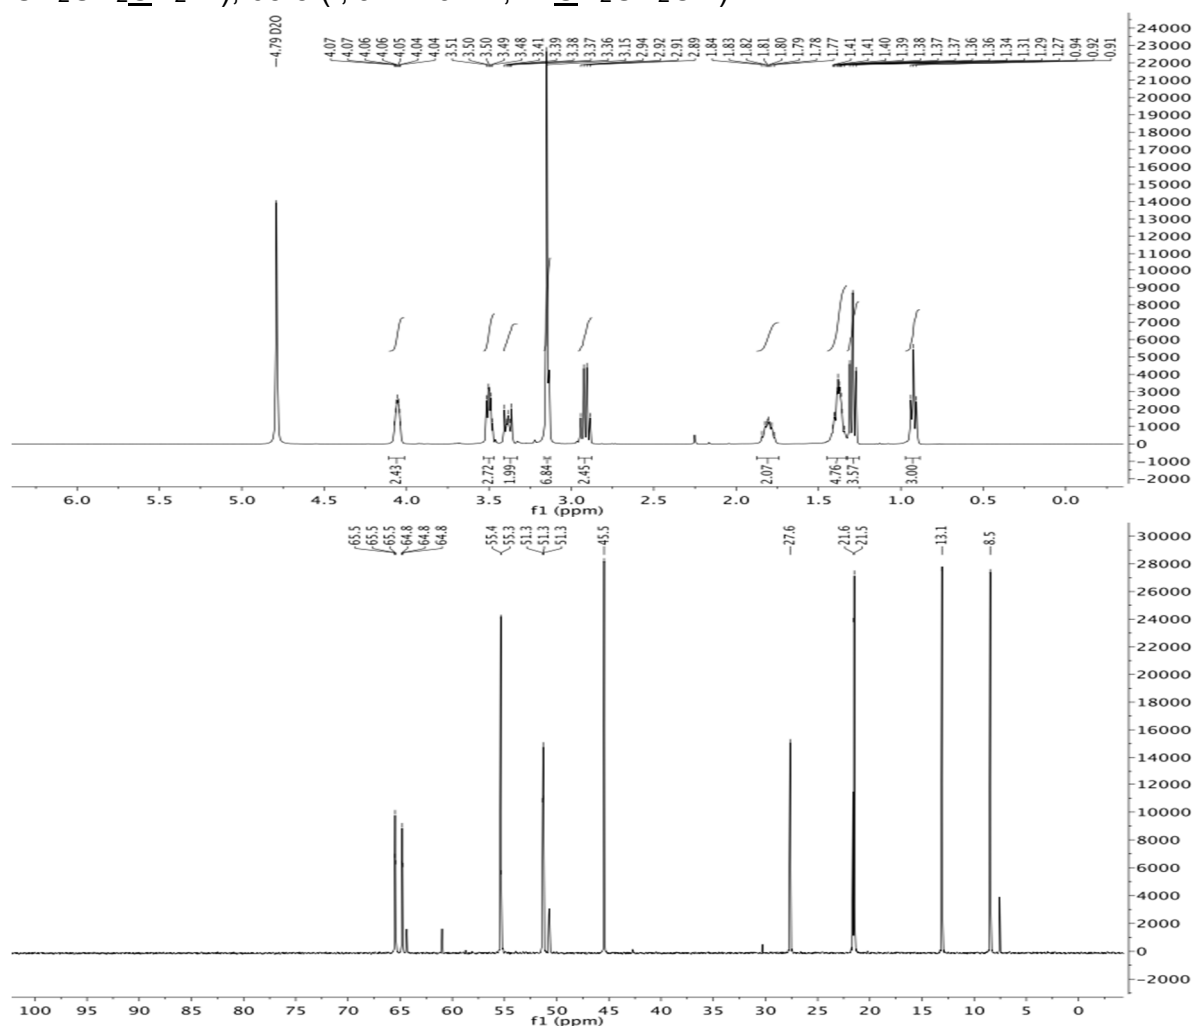

**[C<sub>5</sub>H][C<sub>4</sub>SO<sub>3</sub>]**

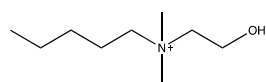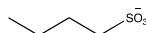

Yellowish solid, <sup>1</sup>H NMR (D<sub>2</sub>O, 400 MHz): δ (ppm)

0.89-0.95 (m, 6H, CH<sub>3</sub>CH<sub>2</sub>CH<sub>2</sub>CH<sub>2</sub>CH<sub>2</sub>N<sup>-</sup>, CH<sub>3</sub>CH<sub>2</sub>CH<sub>2</sub>CH<sub>2</sub>CH<sub>2</sub>SO<sub>3</sub>); 1.33-1.49 (m, 6H, CH<sub>3</sub>CH<sub>2</sub>CH<sub>2</sub>CH<sub>2</sub>CH<sub>2</sub>N<sup>-</sup>, CH<sub>3</sub>CH<sub>2</sub>CH<sub>2</sub>CH<sub>2</sub>CH<sub>2</sub>SO<sub>3</sub>); 1.68-1.83 (m, 4H, CH<sub>3</sub>CH<sub>2</sub>CH<sub>2</sub>CH<sub>2</sub>CH<sub>2</sub>N<sup>-</sup>, CH<sub>3</sub>CH<sub>2</sub>CH<sub>2</sub>CH<sub>2</sub>CH<sub>2</sub>SO<sub>3</sub>); 2.89-2.93 (m, 2H, CH<sub>3</sub>CH<sub>2</sub>CH<sub>2</sub>CH<sub>2</sub>SO<sub>3</sub>); 3.14 (s, 6H-N(CH<sub>3</sub>)<sub>2</sub>); 3.35-3.40 (m, 2H, CH<sub>3</sub>CH<sub>2</sub>CH<sub>2</sub>CH<sub>2</sub>CH<sub>2</sub>N<sup>-</sup>); 3.47-3.50 (m, 2H, -NCH<sub>2</sub>CH<sub>2</sub>OH); 4.03-4.06 (m, 2H, -NCH<sub>2</sub>CH<sub>2</sub>OH); <sup>13</sup>C NMR (D<sub>2</sub>O, 100 MHz): δ (ppm) 12.9 CH<sub>3</sub>CH<sub>2</sub>CH<sub>2</sub>CH<sub>2</sub>CH<sub>2</sub>SO<sub>3</sub>; 13.0 (CH<sub>3</sub>CH<sub>2</sub>CH<sub>2</sub>CH<sub>2</sub>CH<sub>2</sub>N<sup>-</sup>); 21.1 (CH<sub>3</sub>CH<sub>2</sub>CH<sub>2</sub>CH<sub>2</sub>CH<sub>2</sub>SO<sub>3</sub>); 21.5 (CH<sub>3</sub>CH<sub>2</sub>CH<sub>2</sub>CH<sub>2</sub>CH<sub>2</sub>N<sup>-</sup>); 21.6 (CH<sub>3</sub>CH<sub>2</sub>CH<sub>2</sub>CH<sub>2</sub>CH<sub>2</sub>N<sup>-</sup>); 26.1 (CH<sub>3</sub>CH<sub>2</sub>CH<sub>2</sub>CH<sub>2</sub>SO<sub>3</sub>); 27.6 (CH<sub>3</sub>CH<sub>2</sub>CH<sub>2</sub>CH<sub>2</sub>CH<sub>2</sub>N<sup>-</sup>); 50.8 (CH<sub>3</sub>CH<sub>2</sub>CH<sub>2</sub>CH<sub>2</sub>SO<sub>3</sub>); 51.3 (t, *J* = 3.9 Hz, -NCH<sub>2</sub>CH<sub>2</sub>OH); 55.3 (-N(CH<sub>3</sub>)<sub>2</sub>); 64.8 (t, *J* = 2.8 Hz, CH<sub>3</sub>CH<sub>2</sub>CH<sub>2</sub>CH<sub>2</sub>CH<sub>2</sub>N<sup>-</sup>); 65.5 (t, *J* = 2.7 Hz, -NCH<sub>2</sub>CH<sub>2</sub>OH)

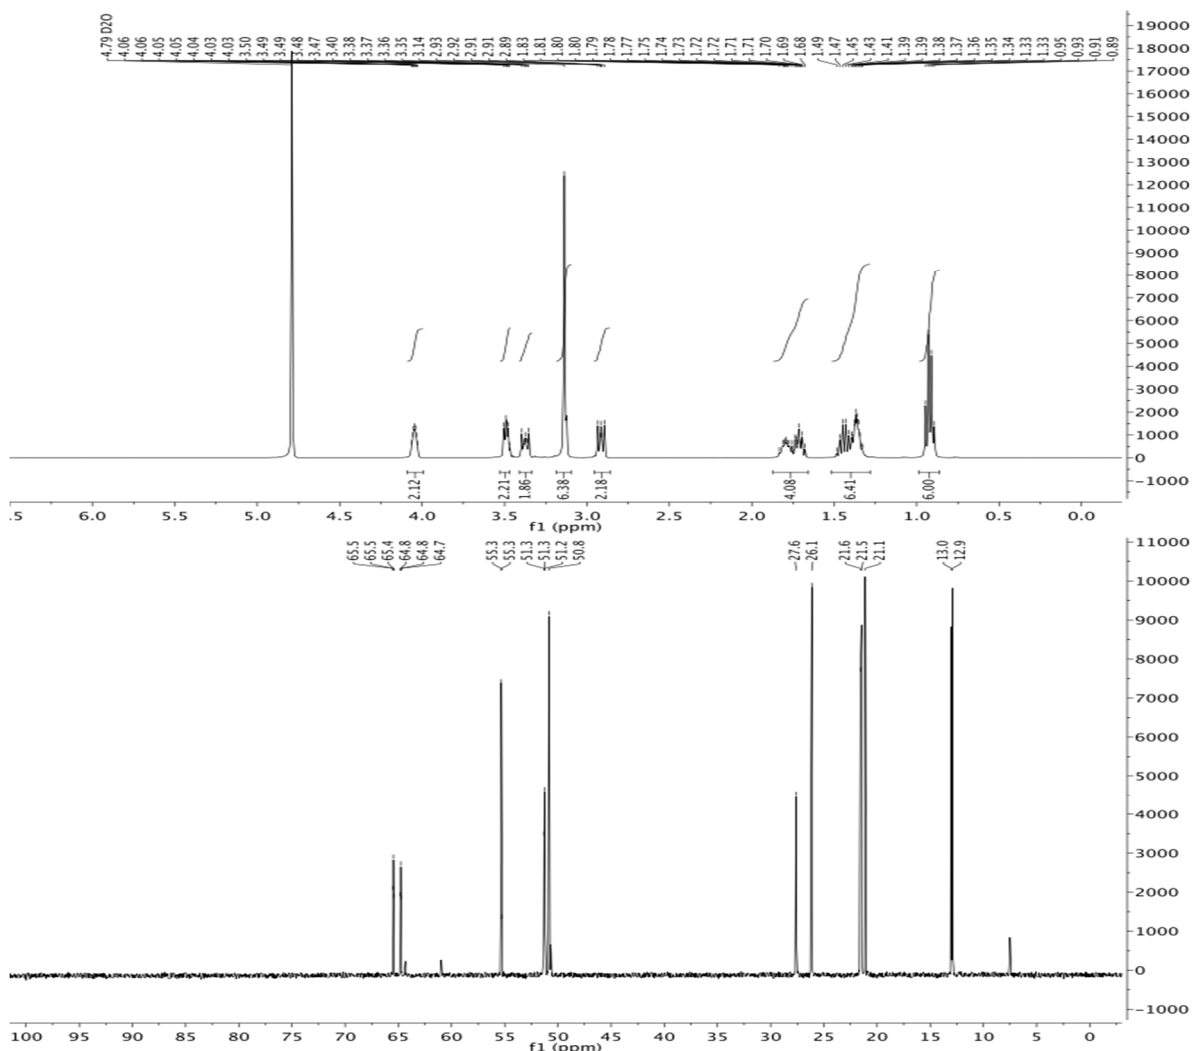

# **[C<sub>2</sub>Ch]<sub>2</sub>[SucAla]**

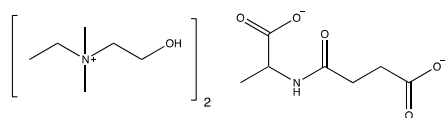

Viscous oil, <sup>1</sup>H NMR (D<sub>2</sub>O, 400 MHz): δ (ppm) 1.31-1.38 (m, 6H, CH<sub>3</sub>CH<sub>2</sub>N-, 3H, -CH(CH<sub>3</sub>)NH-); 2.43-2.50 (m, 4H, -C(O)CH<sub>2</sub>CH<sub>2</sub>C(O)O-); 3.11 (s, 12H, -N(CH<sub>3</sub>)<sub>2</sub>); 3.43-3.49 (m, 4H, -NCH<sub>2</sub>CH<sub>2</sub>OH, 4H, CH<sub>3</sub>CH<sub>2</sub>N-); 4.02-4.06 (m, 4H, -NCH<sub>2</sub>CH<sub>2</sub>OH); 4.12 (q, 1H, J = 7.3 Hz, J = 14.5 Hz, -CH(CH<sub>3</sub>)NH-); <sup>13</sup>C NMR (D<sub>2</sub>O, 100 MHz): δ (ppm) 7.5 (CH<sub>3</sub>CH<sub>2</sub>N-); 17.5 (-CH(CH<sub>3</sub>)NH-); 32.3 (COCH<sub>2</sub>CH<sub>2</sub>COO); 33.0 (C(O)CH<sub>2</sub>CH<sub>2</sub>C(O)O); 50.7 (-NCH<sub>2</sub>CH<sub>2</sub>OH); 55.3 (-N(CH<sub>3</sub>)<sub>2</sub>); 57.4 (-CH(CH<sub>3</sub>)NH-); 60.9 (CH<sub>3</sub>CH<sub>2</sub>N-); 64.3 (-NCH<sub>2</sub>CH<sub>2</sub>OH); 174.8 (-NH(CO)); 180.2 (-C(O)CH<sub>2</sub>CH<sub>2</sub>C(O)O); 181.0 (-C(O)CH<sub>2</sub>CH<sub>2</sub>C(O)O)

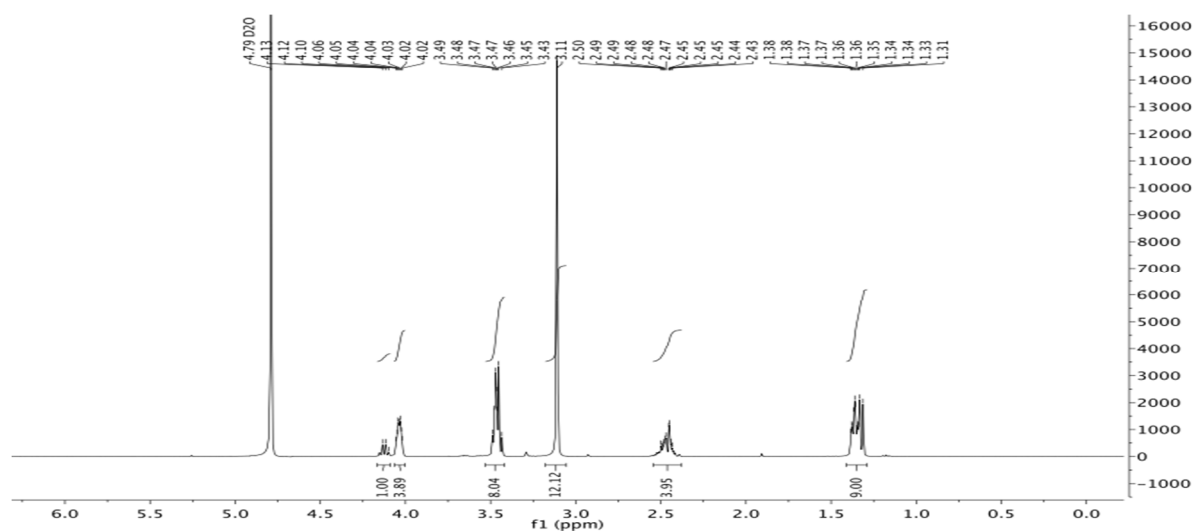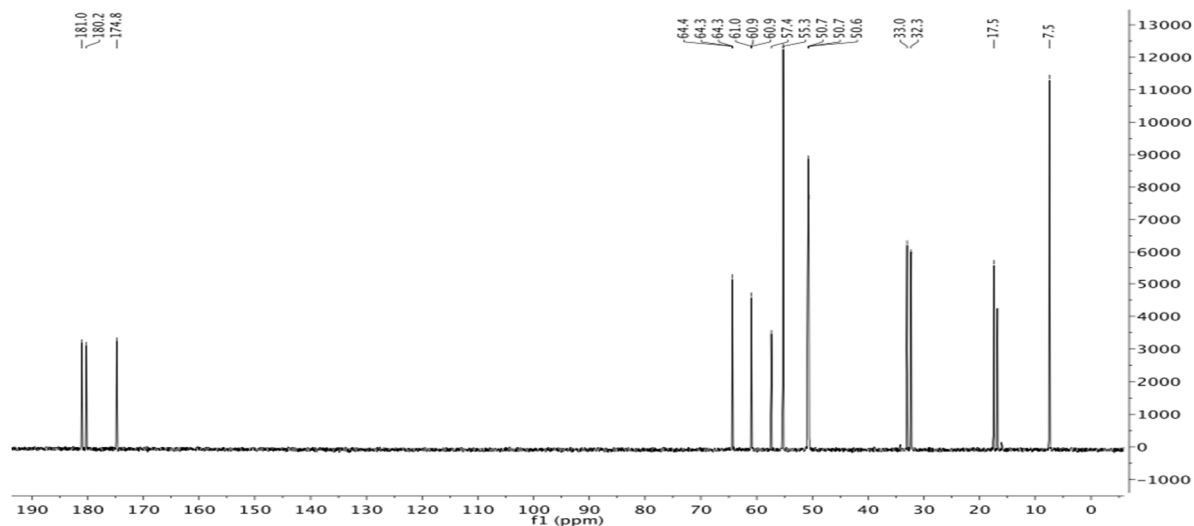

**[C<sub>3</sub>Ch]<sub>2</sub>[SucAla]**

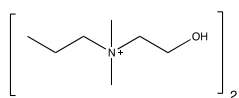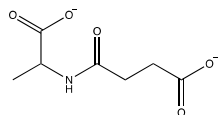

Viscous oil, <sup>1</sup>H NMR (D<sub>2</sub>O, 400 MHz): δ (ppm)

0.95 (t, 6H, *J* = 7.3 Hz, CH<sub>3</sub>CH<sub>2</sub>CH<sub>2</sub>N-); 1.30 (d, 3H, *J* = 7.1 Hz, -CH(CH<sub>3</sub>)NH-); 1.75-1.82 (m, 4H, CH<sub>3</sub>CH<sub>2</sub>CH<sub>2</sub>N-); 2.41-2.48 (m, 4H, -C(O)CH<sub>2</sub>CH<sub>2</sub>C(O)O); 3.11 (s, 12H, -N(CH<sub>3</sub>)<sub>2</sub>); 3.28-3.33 (m, 4H, CH<sub>3</sub>CH<sub>2</sub>CH<sub>2</sub>N-); 3.46 (t, 2H, *J* = 5.8 Hz, -NCH<sub>2</sub>CH<sub>2</sub>OH); 4.00-4.03 (m, 4H, -NCH<sub>2</sub>CH<sub>2</sub>OH); 4.11 (q, 1H, *J* = 7.2 Hz, *J* = 14.4 Hz, -CH(CH<sub>3</sub>)NH-); <sup>13</sup>C NMR (D<sub>2</sub>O, 100 MHz): δ (ppm) 9.8 (CH<sub>3</sub>CH<sub>2</sub>CH<sub>2</sub>N-); 15.6 (CH<sub>3</sub>CH<sub>2</sub>CH<sub>2</sub>N-); 17.5 (-CH(CH<sub>3</sub>)NH-); 32.3 (COCH<sub>2</sub>CH<sub>2</sub>COO); 32.9 (C(O)CH<sub>2</sub>CH<sub>2</sub>C(O)O); 50.9 (-CH(CH<sub>3</sub>)NH-); 51.3 (-NCH<sub>2</sub>CH<sub>2</sub>OH); 55.3 (-N(CH<sub>3</sub>)<sub>2</sub>); 64.8 (CH<sub>3</sub>CH<sub>2</sub>CH<sub>2</sub>N-); 66.7 (-NCH<sub>2</sub>CH<sub>2</sub>OH); 174.8 (-NH(CO)); 180.2 (-C(O)CH<sub>2</sub>CH<sub>2</sub>C(O)O); 180.9 (-C(O)CH<sub>2</sub>CH<sub>2</sub>C(O)O)

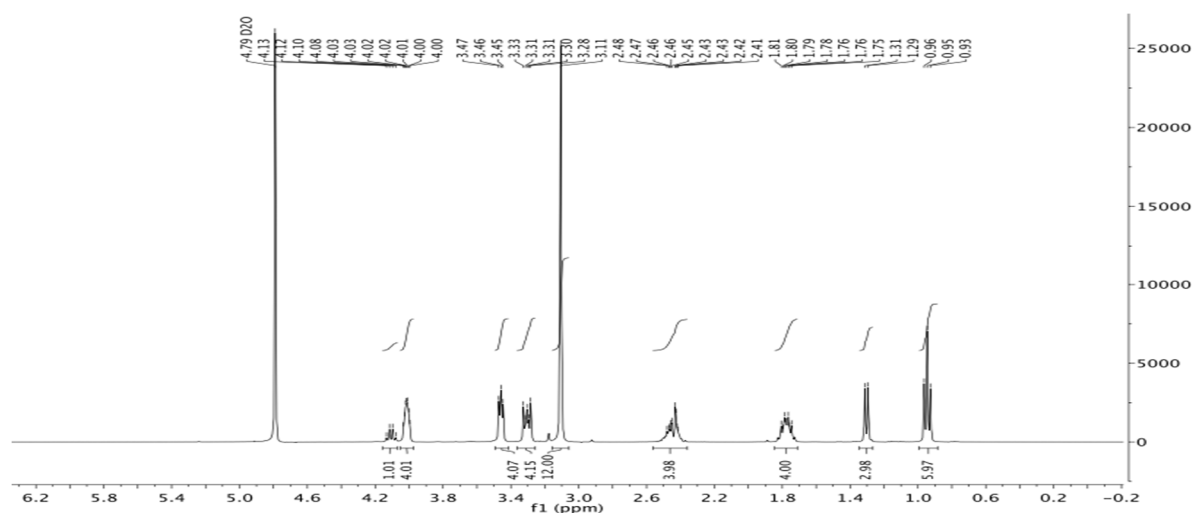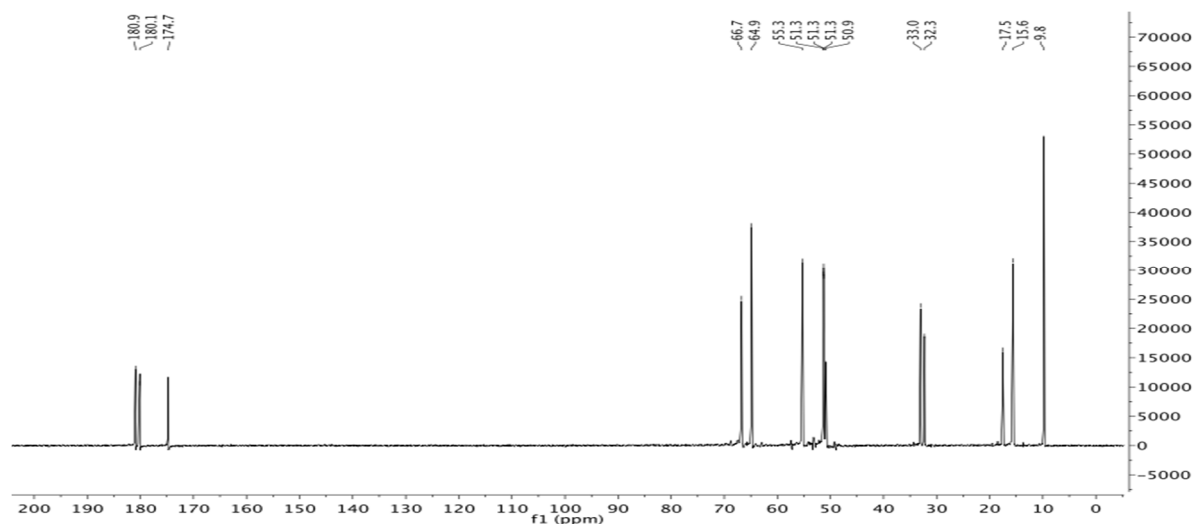

# [C<sub>4</sub>Ch]<sub>2</sub>[SucAla]

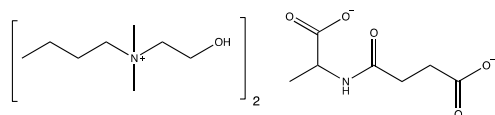

Viscous oil, <sup>1</sup>H NMR (D<sub>2</sub>O, 400 MHz): δ (ppm)

0.95 (t, 6H, *J* = 7.2 Hz, CH<sub>3</sub>CH<sub>2</sub>CH<sub>2</sub>CH<sub>2</sub>N-); 1.31-1.42 (m, 4H, CH<sub>3</sub>CH<sub>2</sub>CH<sub>2</sub>CH<sub>2</sub>N-, 3H, -CH(CH<sub>3</sub>)NH-); 1.71-1.79 (m, 4H, CH<sub>3</sub>CH<sub>2</sub>CH<sub>2</sub>CH<sub>2</sub>N-); 2.41-2.52 (m, 4H, -C(O)CH<sub>2</sub>CH<sub>2</sub>C(O)O); 3.12 (s, 12H, -N(CH<sub>3</sub>)<sub>2</sub>); 3.34-3.39 (m, 4H, CH<sub>3</sub>CH<sub>2</sub>CH<sub>2</sub>CH<sub>2</sub>N-); 3.46 (t, 2H, *J* = 5.1 Hz, -NCH<sub>2</sub>CH<sub>2</sub>OH); 4.01-4.05 (m, 4H, -NCH<sub>2</sub>CH<sub>2</sub>OH); 4.12 (q, 1H, *J* = 7.2 Hz, *J* = 14.3 Hz, -CH(CH<sub>3</sub>)NH-); <sup>13</sup>C NMR (D<sub>2</sub>O, 100 MHz): δ (ppm) 12.8 (CH<sub>3</sub>CH<sub>2</sub>CH<sub>2</sub>CH<sub>2</sub>N-); 17.5 (-CH(CH<sub>3</sub>)NH-); 19.0 (CH<sub>3</sub>CH<sub>2</sub>CH<sub>2</sub>CH<sub>2</sub>N-); 23.9 (CH<sub>3</sub>CH<sub>2</sub>CH<sub>2</sub>CH<sub>2</sub>N-); 32.3 (COCH<sub>2</sub>CH<sub>2</sub>COO); 32.9 (C(O)CH<sub>2</sub>CH<sub>2</sub>C(O)O); 50.9 (-CH(CH<sub>3</sub>)NH-); 51.3 (-NCH<sub>2</sub>CH<sub>2</sub>OH); 55.3 (-N(CH<sub>3</sub>)<sub>2</sub>); 64.8 (CH<sub>3</sub>CH<sub>2</sub>CH<sub>2</sub>N-); 65.3 (-NCH<sub>2</sub>CH<sub>2</sub>OH); 174.8 (-NH(CO)); 180.2 (-C(O)CH<sub>2</sub>CH<sub>2</sub>C(O)O); 180.9 (-C(O)CH<sub>2</sub>CH<sub>2</sub>C(O)O)

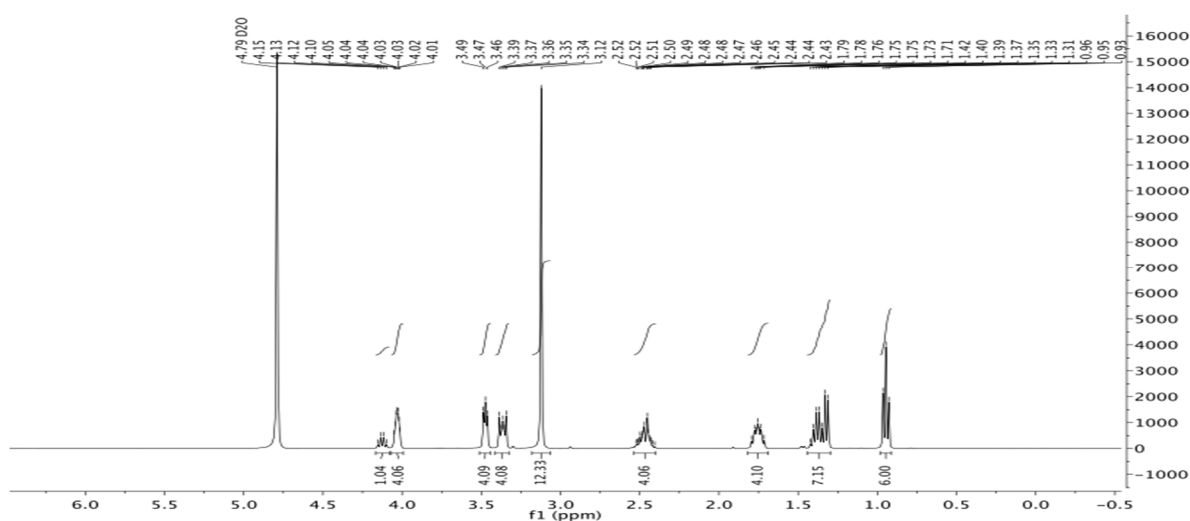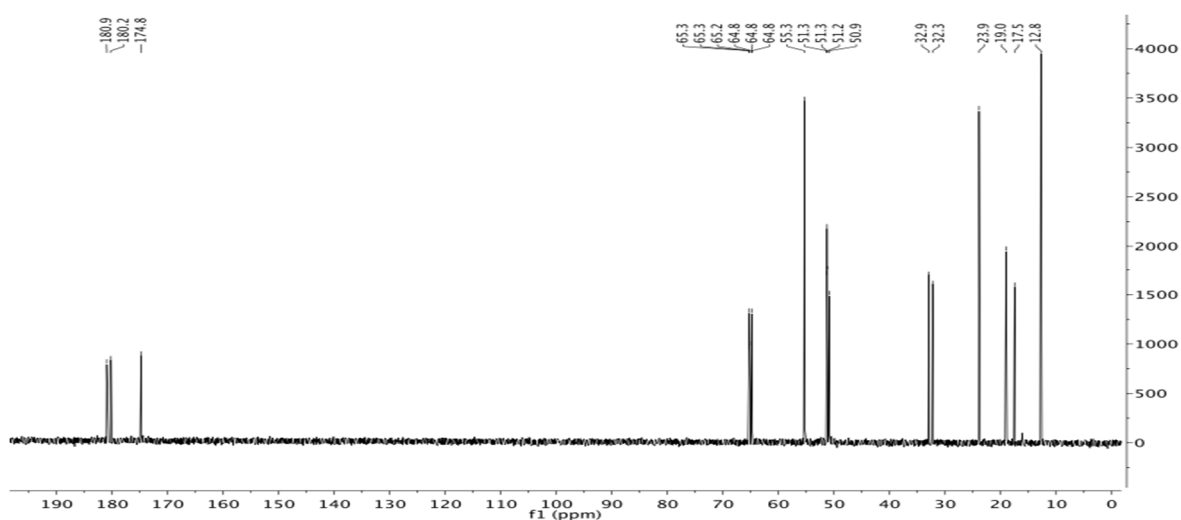



**[C<sub>5</sub>Ch]<sub>2</sub>[SucAla]**

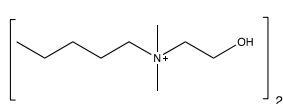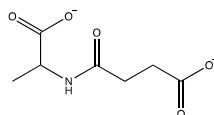

Viscous oil, <sup>1</sup>H NMR (D<sub>2</sub>O, 400 MHz): δ (ppm)

0.89 (t, 6H, *J* = 6.4 Hz, CH<sub>3</sub>CH<sub>2</sub>CH<sub>2</sub>CH<sub>2</sub>CH<sub>2</sub>N-); 1.30-1.37 (m, 8H, CH<sub>3</sub>CH<sub>2</sub>CH<sub>2</sub>CH<sub>2</sub>CH<sub>2</sub>N-, 3H, -CH(CH<sub>3</sub>)NH-); 1.73-1.81 (m, 4H, CH<sub>3</sub>CH<sub>2</sub>CH<sub>2</sub>CH<sub>2</sub>CH<sub>2</sub>N-); 2.41-2.49 (m, 4H, -C(O)CH<sub>2</sub>CH<sub>2</sub>C(O)O); 3.11 (s, 12H, -N(CH<sub>3</sub>)<sub>2</sub>); 3.33-3.37 (m, 4H, CH<sub>3</sub>CH<sub>2</sub>CH<sub>2</sub>CH<sub>2</sub>CH<sub>2</sub>N-); 3.45-3.48 (m, 2H, -NCH<sub>2</sub>CH<sub>2</sub>OH); 4.00-4.04 (m, 4H, -NCH<sub>2</sub>CH<sub>2</sub>OH); 4.11 (q, 1H, *J* = 7.5 Hz, *J* = 14.5 Hz, -CH(CH<sub>3</sub>)NH-); <sup>13</sup>C NMR (D<sub>2</sub>O, 100 MHz): δ (ppm) 13.0 (CH<sub>3</sub>CH<sub>2</sub>CH<sub>2</sub>CH<sub>2</sub>CH<sub>2</sub>N-); 17.5 (-CH(CH<sub>3</sub>)NH-); 21.5 (CH<sub>3</sub>CH<sub>2</sub>CH<sub>2</sub>CH<sub>2</sub>N-); 21.6 (CH<sub>3</sub>CH<sub>2</sub>CH<sub>2</sub>CH<sub>2</sub>N-); 27.6 (CH<sub>3</sub>CH<sub>2</sub>CH<sub>2</sub>CH<sub>2</sub>CH<sub>2</sub>N-); 32.3 (COCH<sub>2</sub>CH<sub>2</sub>COO); 33.1 (C(O)CH<sub>2</sub>CH<sub>2</sub>C(O)O); 50.9 (-CH(CH<sub>3</sub>)NH-); 51.3 (-NCH<sub>2</sub>CH<sub>2</sub>OH); 55.3 (-N(CH<sub>3</sub>)<sub>2</sub>); 64.8 (CH<sub>3</sub>CH<sub>2</sub>CH<sub>2</sub>N-); 65.4 (-NCH<sub>2</sub>CH<sub>2</sub>OH); 174.7 (-NH(CO)); 180.1 (-C(O)CH<sub>2</sub>CH<sub>2</sub>C(O)O); 181.0 (-C(O)CH<sub>2</sub>CH<sub>2</sub>C(O)O)

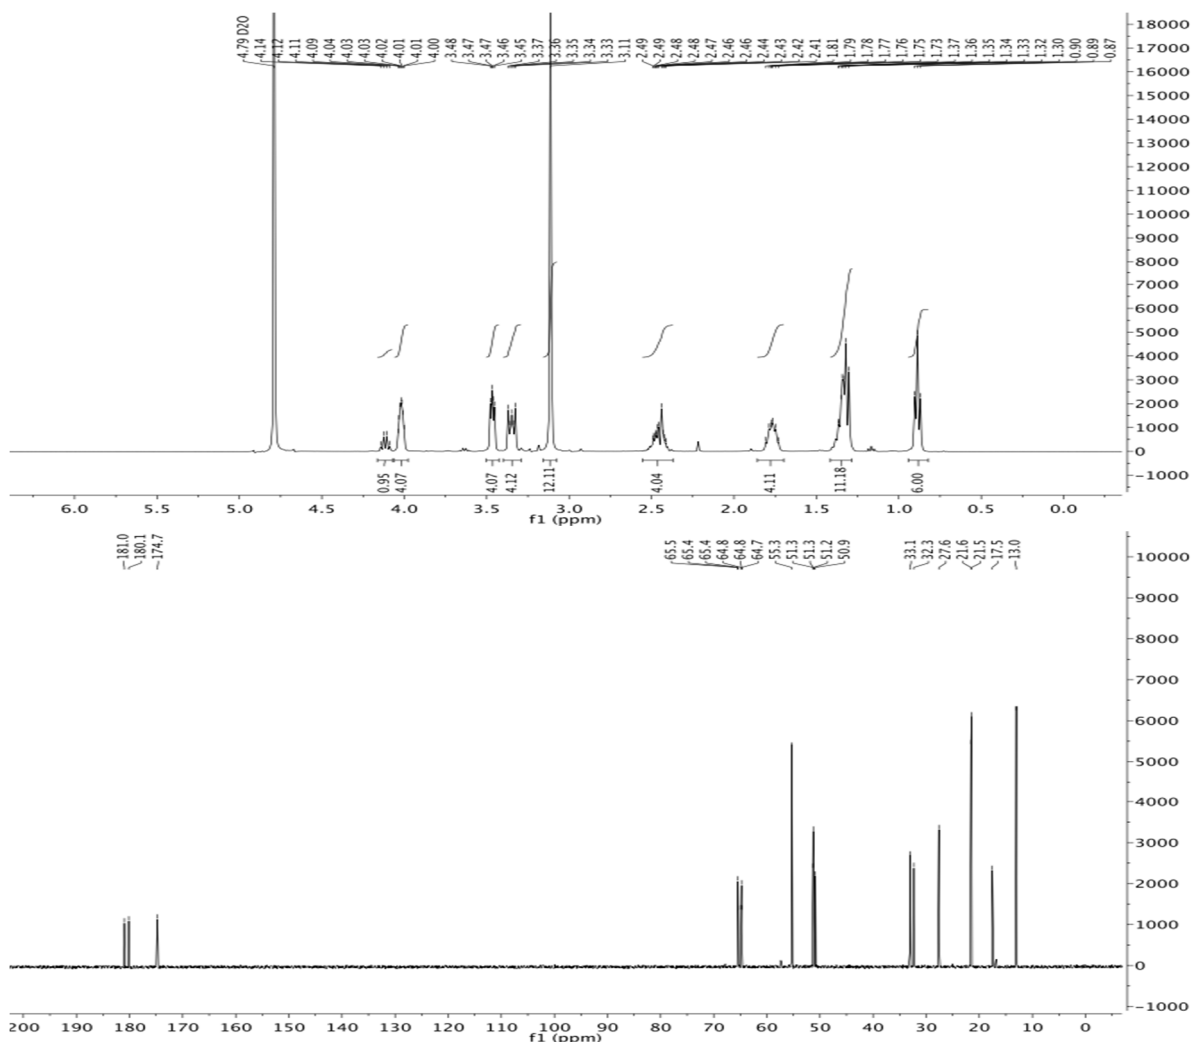

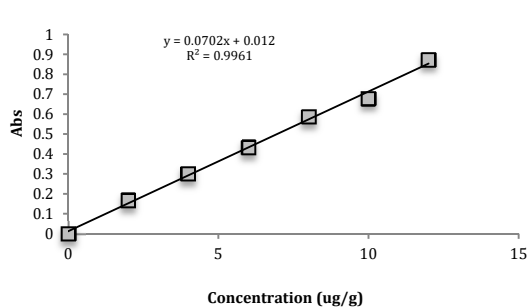

**Paracetamol**

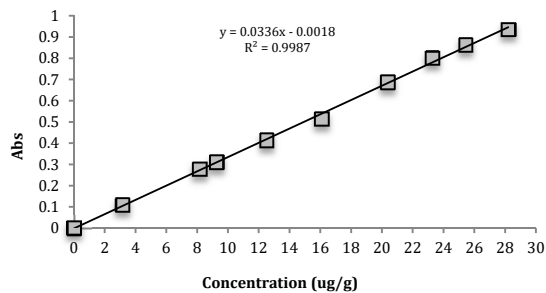

**Sodium diclofenac**

**Figure S2.** Calibration Curves of Paracetamol and Sodium Diclofenac in octanol-saturated water

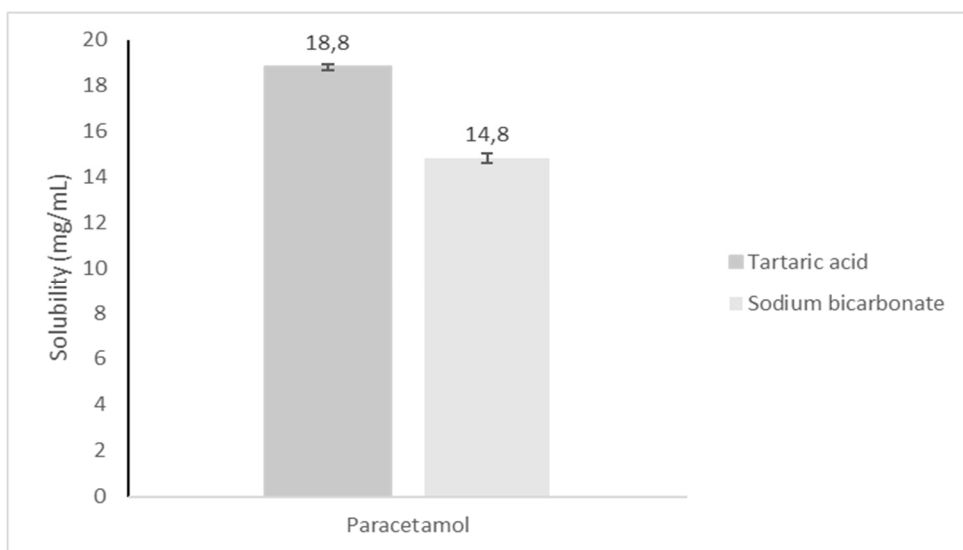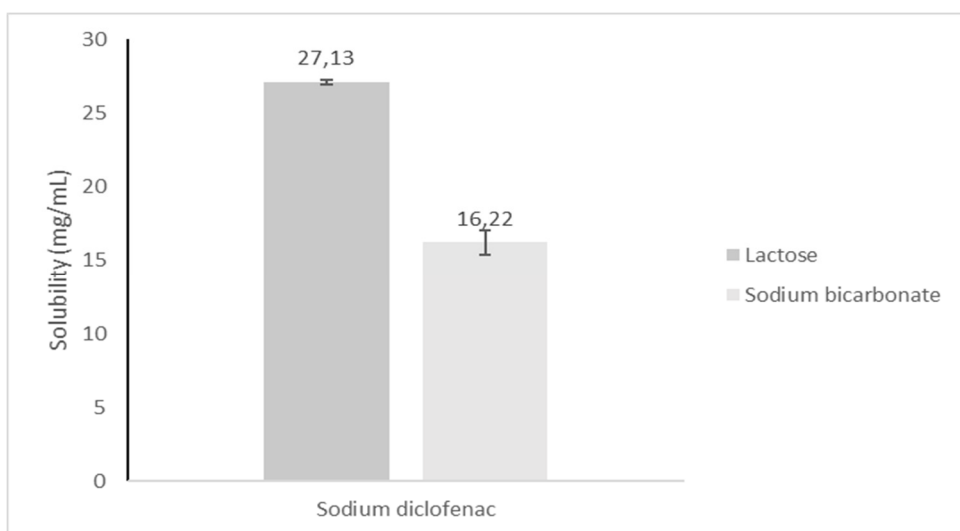

**Figure S3.** Solubility of Paracetamol and Sodium Diclofenac with common excipients in aqueous solutions at 37 °C after 24 h
